# Supplementary material for: Ultrasound Assisted Synthesis and In Silico Modelling of 1,2,4-Triazole Coupled Acetamide Derivatives of 2-(4-Isobutylphenyl)propanoic acid as Potential Anticancer Agents
Source: MDPI journal article supplement (doi:10.3390/molecules27227984), 2022-11-17
Supplement: s1 [file s1]

# **“Ultrasound Assisted Synthesis and *In Silico* Modelling of 1,2,4-triazole Coupled Acetamide Derivatives of 2-(4-isobutylphenyl) propanoic acid as Potential Anticancer Agents”**

Sadaf Mahmood <sup>1</sup>, Samreen Gul Khan<sup>1,\*</sup>, Azhar Rasul <sup>2</sup>, Jørn Bolstad Christensen <sup>3</sup>, Mohammed A.S Abourehab<sup>4,\*</sup>

<sup>1</sup> Department of Chemistry, Drug Design and Medicinal Chemistry Laboratory, Faculty of Physical Science, Government College University, Faisalabad-38000, Pakistan

<sup>2</sup> Department of Zoology, Faculty of Life Sciences, Government College University Faisalabad, 38000 Faisalabad, Pakistan.

<sup>3</sup> Department of Chemistry, Faculty of Science, University of Copenhagen, Copenhagen Denmark.

<sup>4</sup> Department of Pharmaceutics College of Pharmacy, Umm Al-Qura University, Makkah 21955, Saudi Arabia

\* Correspondence: samreengul@gcuf.edu (S.G.K.); maabourehab@uqu.edu.sa (M.A.S.A.);

Tel.: +92-300-427-0077 (S.G.K.).



## Table of Contents:

|                                                                                             |    |
|---------------------------------------------------------------------------------------------|----|
| <b>Figure S1:</b> $^1\text{H}$ NMR spectrum of compound <b>2</b> (Full spectrum) .....      | 3  |
| <b>Figure S2:</b> $^1\text{H}$ NMR spectrum of compound <b>3</b> (Full spectrum) .....      | 3  |
| <b>Figure S3:</b> $^1\text{H}$ NMR spectrum of compound <b>4</b> (Full spectrum) .....      | 4  |
| <b>Figure S4:</b> $^1\text{H}$ NMR spectrum of compound <b>4</b> (aromatic region).....     | 4  |
| <b>Figure S5:</b> $^1\text{H}$ NMR spectrum of compound <b>4</b> (aliphatic region) .....   | 5  |
| <b>Figure S6:</b> $^{13}\text{C}$ NMR spectrum of compound <b>2</b> .....                   | 5  |
| <b>Figure S7:</b> $^{13}\text{C}$ NMR spectrum of compound <b>3</b> .....                   | 6  |
| <b>Figure S8:</b> $^{13}\text{C}$ NMR spectrum of compound <b>4</b> .....                   | 6  |
| <b>Figure S9:</b> $^1\text{H}$ NMR spectrum of compound <b>6a</b> (Full) .....              | 7  |
| <b>Figure S10:</b> $^1\text{H}$ NMR spectrum of compound <b>6a</b> (aromatic region).....   | 7  |
| <b>Figure S11:</b> $^1\text{H}$ NMR spectrum of compound <b>6a</b> (aliphatic region) ..... | 8  |
| <b>Figure S12:</b> $^{13}\text{C}$ NMR spectrum of compound <b>6a</b> (Full spectrum) ..... | 8  |
| <b>Figure S13:</b> $^1\text{H}$ NMR spectrum of compound <b>6b</b> (Full spectrum) .....    | 9  |
| <b>Figure S14:</b> COSY- $^1\text{H}$ NMR spectrum of compound <b>6b</b> .....              | 9  |
| <b>Figure S15:</b> $^{13}\text{C}$ NMR spectrum of compound <b>6b</b> (Full spectrum) ..... | 10 |
| <b>Figure S16:</b> $^1\text{H}$ NMR spectrum of compound <b>6c</b> (Full spectrum).....     | 10 |
| <b>Figure S17:</b> $^1\text{H}$ NMR spectrum of compound <b>6c</b> (aromatic region) .....  | 11 |
| <b>Figure S18:</b> COSY- $^1\text{H}$ NMR spectrum of compound <b>6c</b> .....              | 11 |
| <b>Figure S19:</b> $^{13}\text{C}$ NMR spectrum of compound <b>6c</b> (Full spectrum) ..... | 12 |
| <b>Figure S20:</b> $^1\text{H}$ NMR spectrum of compound <b>6d</b> (Full spectrum) .....    | 12 |
| <b>Figure S21:</b> COSY $^1\text{H}$ NMR spectrum of compound <b>6d</b> .....               | 13 |
| <b>Figure S22:</b> $^{13}\text{C}$ NMR spectrum of compound <b>6d</b> (Full spectrum) ..... | 13 |
| <b>Figure S23:</b> $^1\text{H}$ NMR spectrum of compound <b>6e</b> (Full) .....             | 14 |
| <b>Figure S24:</b> COSY $^1\text{H}$ NMR spectrum of compound <b>6e</b> .....               | 14 |
| <b>Figure S25:</b> $^{13}\text{C}$ NMR spectrum of compound <b>6e</b> (Full spectrum).....  | 15 |
| <b>Figure S26:</b> $^1\text{H}$ NMR spectrum of compound <b>6f</b> (Full Spectrum) .....    | 15 |
| <b>Figure S27:</b> COSY $^1\text{H}$ NMR spectrum of compound <b>6f</b> .....               | 16 |
| <b>Figure S28:</b> $^{13}\text{C}$ NMR spectrum of compound <b>6f</b> .....                 | 16 |
| <b>Figure S29:</b> Mass spectrum of compound <b>6a</b> .....                                | 17 |
| <b>Figure S30:</b> Mass spectrum of compound <b>6b</b> .....                                | 18 |
| <b>Figure S31:</b> Mass spectrum of compound <b>6c</b> .....                                | 19 |
| <b>Figure S32:</b> Mas spectrum of compound <b>6d</b> .....                                 | 20 |
| <b>Figure S33:</b> Mass spectrum of compound <b>6e</b> .....                                | 21 |
| <b>Figure S34:</b> Mass spectrum of compound <b>6f</b> .....                                | 22 |



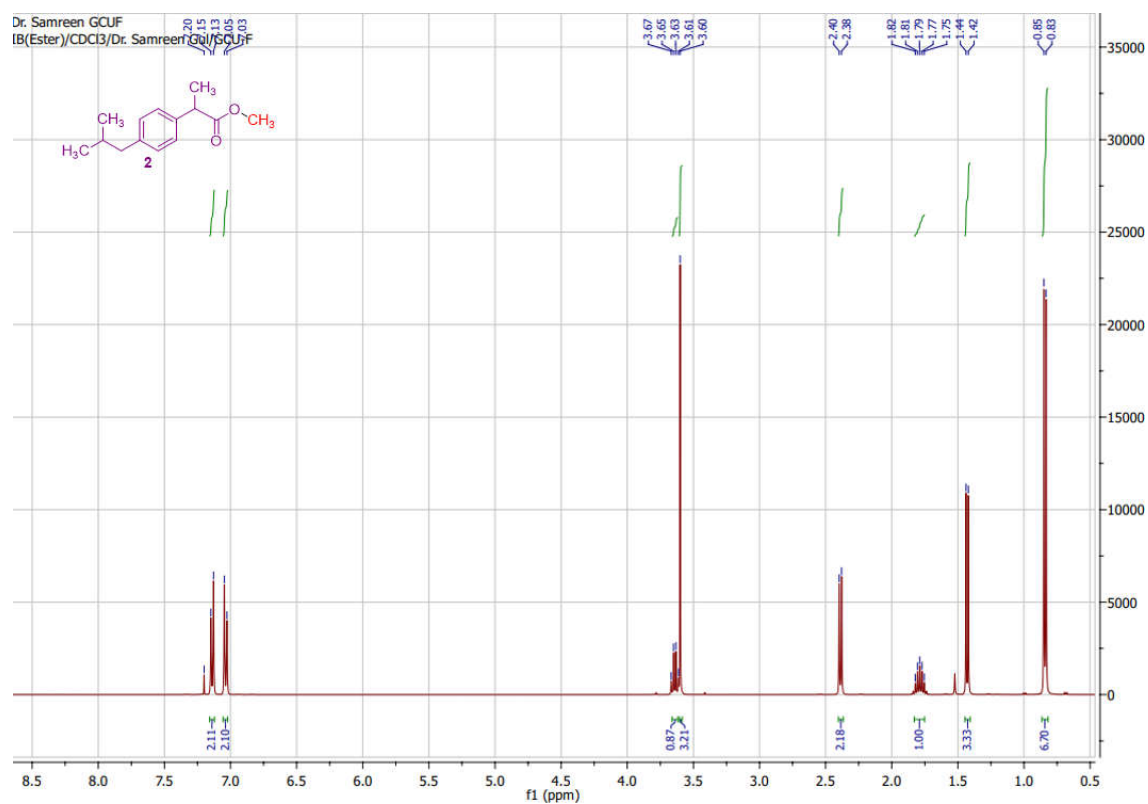

**Figure S1:** <sup>1</sup>H NMR spectrum of compound 2 (Full)

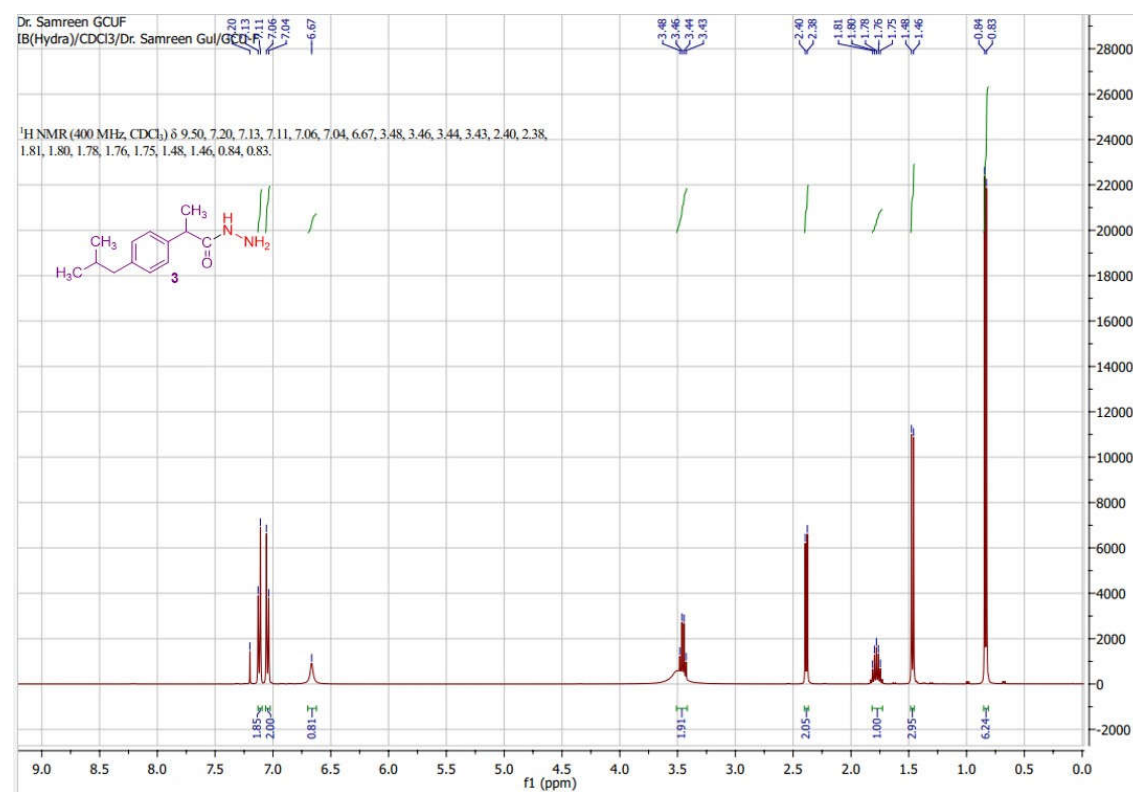

**Figure S2:** <sup>1</sup>H NMR spectrum of compound 3 (Full)



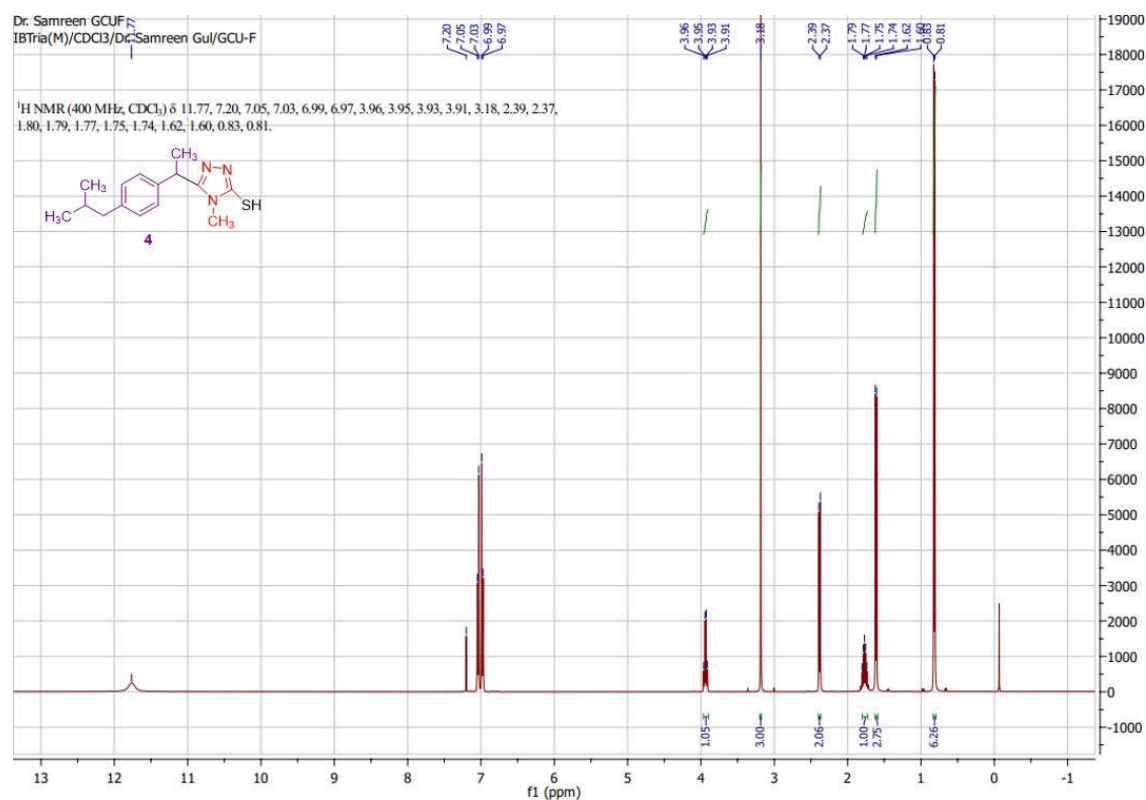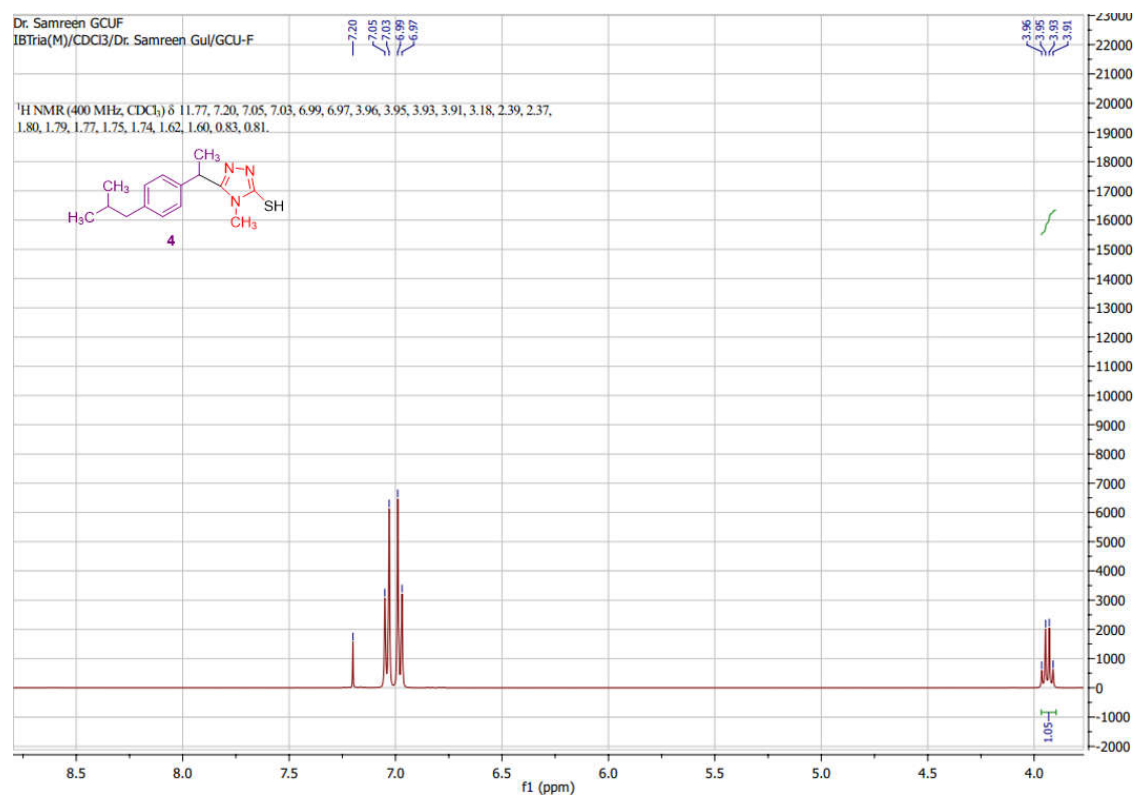



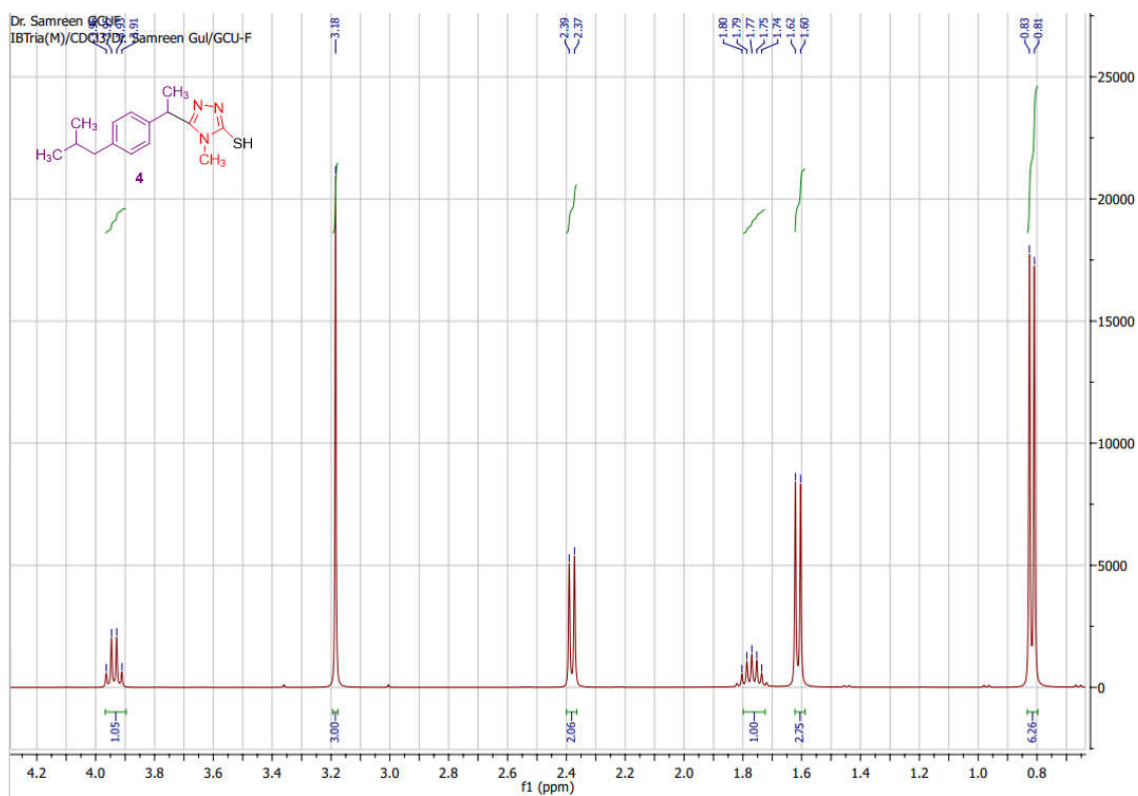

**Figure S5.** <sup>1</sup>H NMR spectrum of compound 4 (aliphatic region)

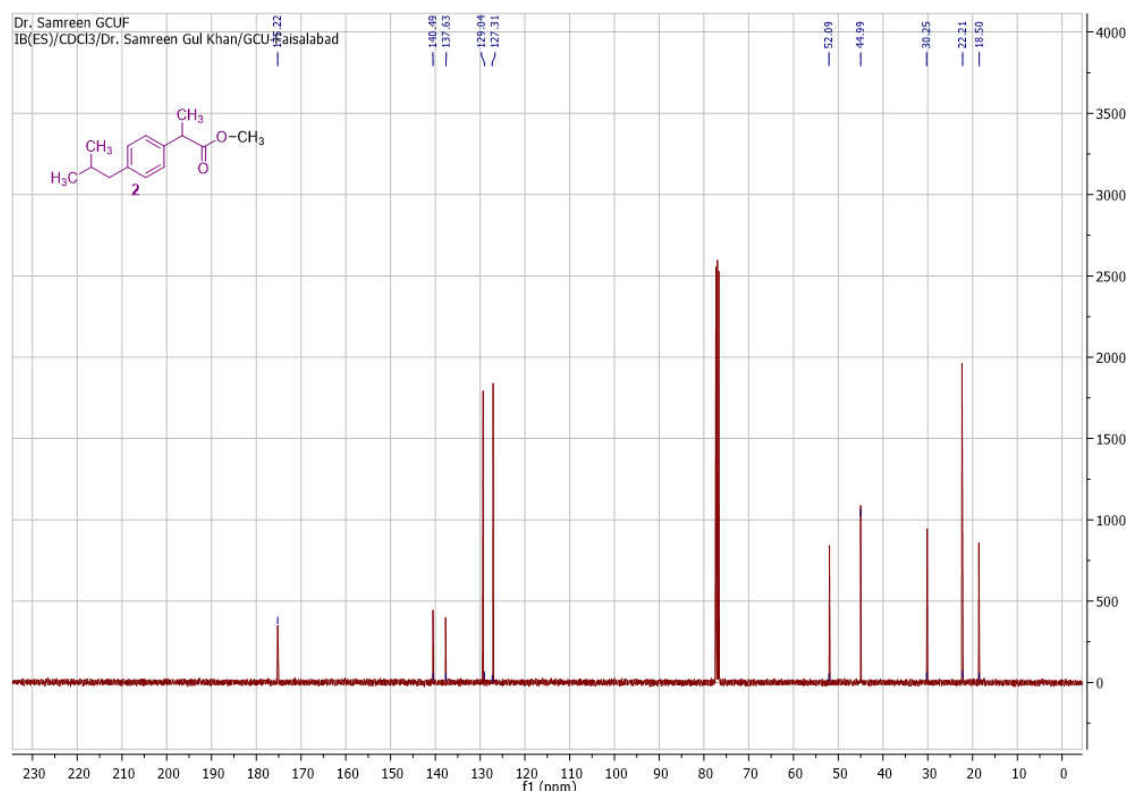

**Figure S6.** <sup>13</sup>C NMR spectrum of compound 2



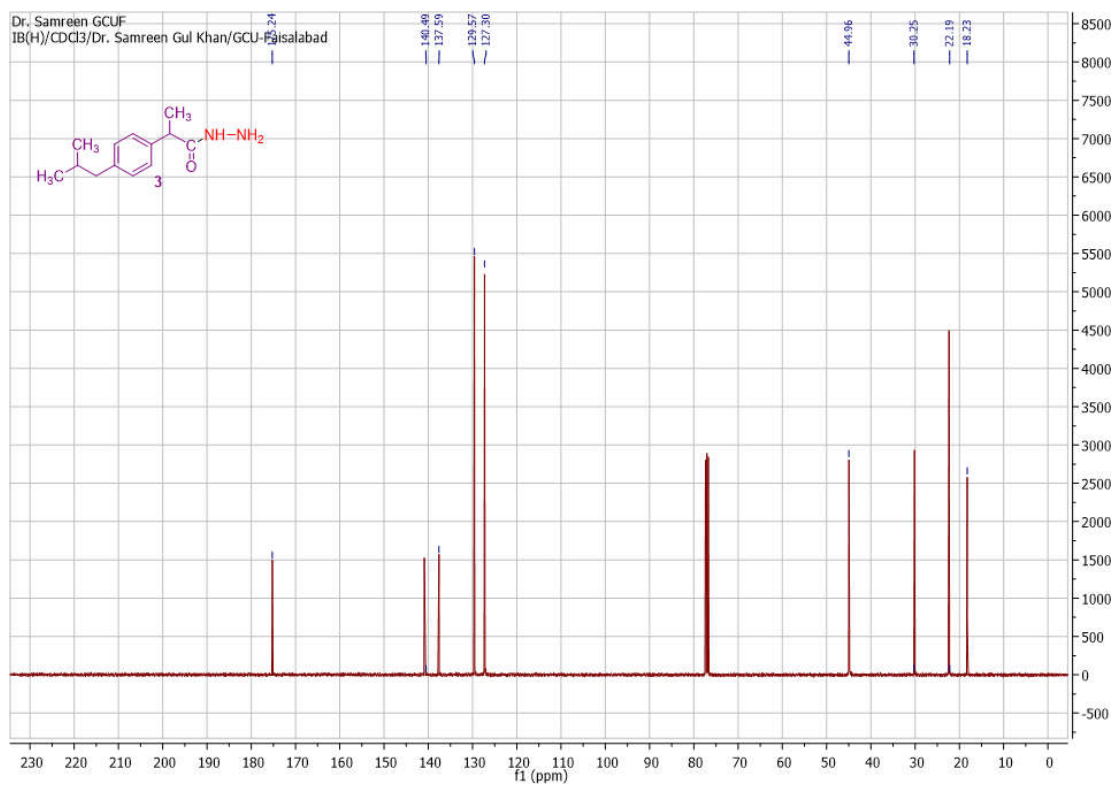

**Figure S7.** <sup>13</sup>C NMR spectrum of compound 3

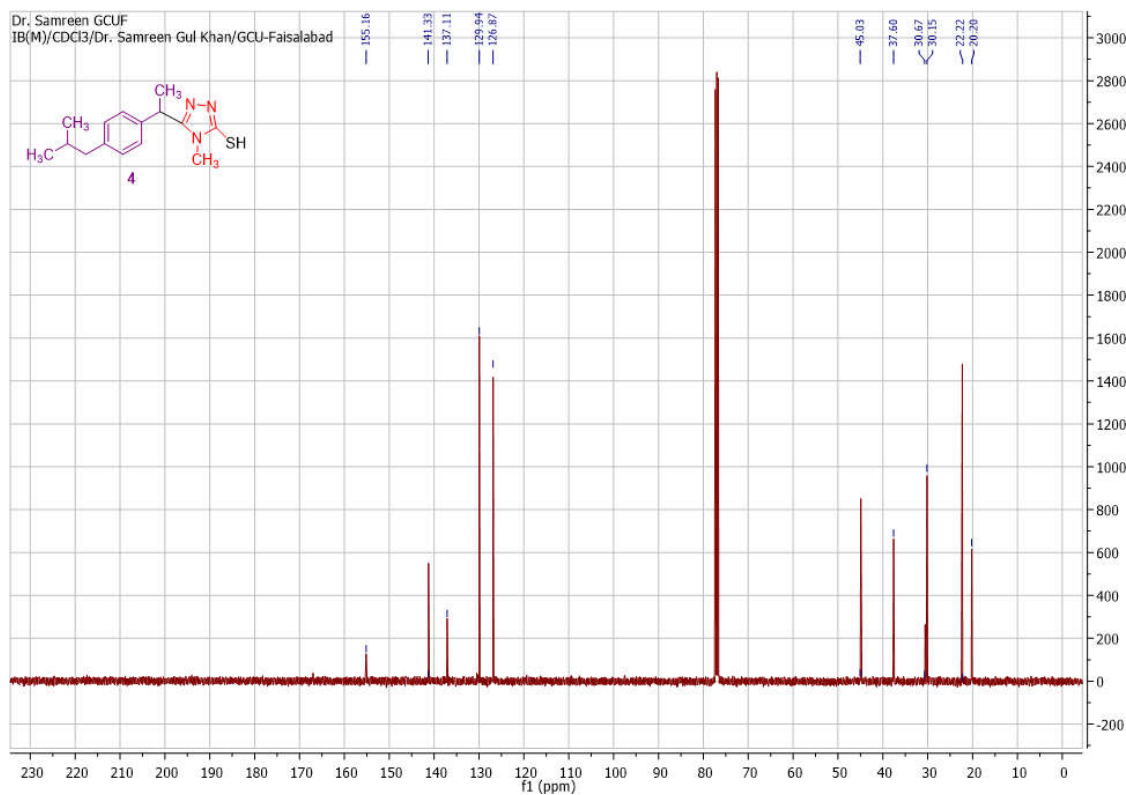

**Figure S8.** <sup>13</sup>C NMR spectrum of compound 4



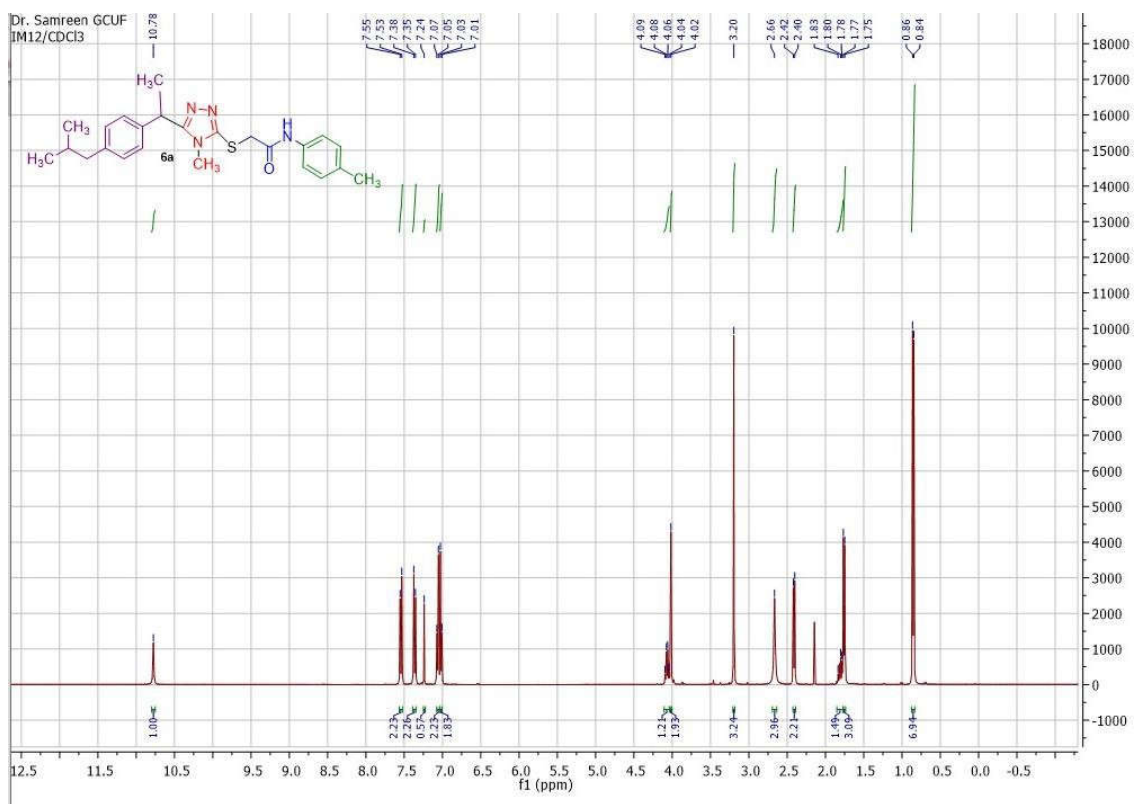

**Figure S9:** <sup>1</sup>H NMR spectrum of compound **6a** (Full)

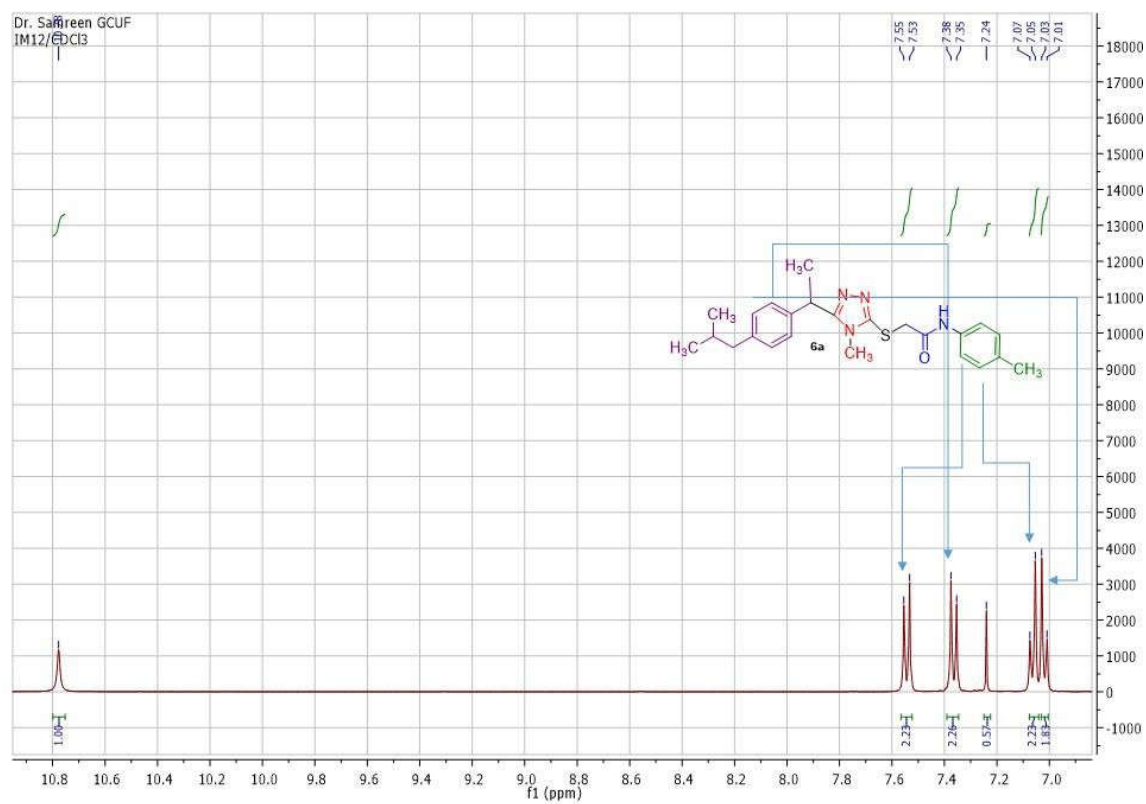

**Figure S10.** <sup>1</sup>H NMR spectrum of compound **6a** (aromatic region)



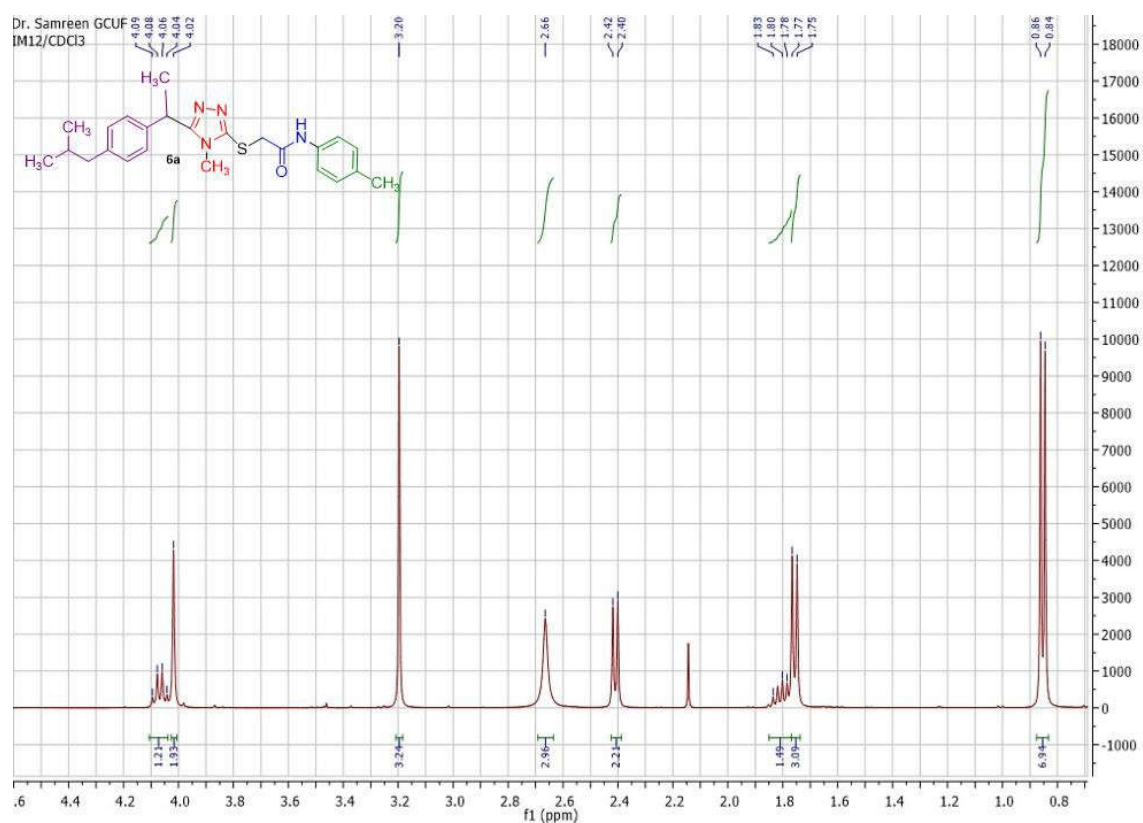

**Figure S11.** <sup>1</sup>H NMR spectrum of compound **6a** (aliphatic region)

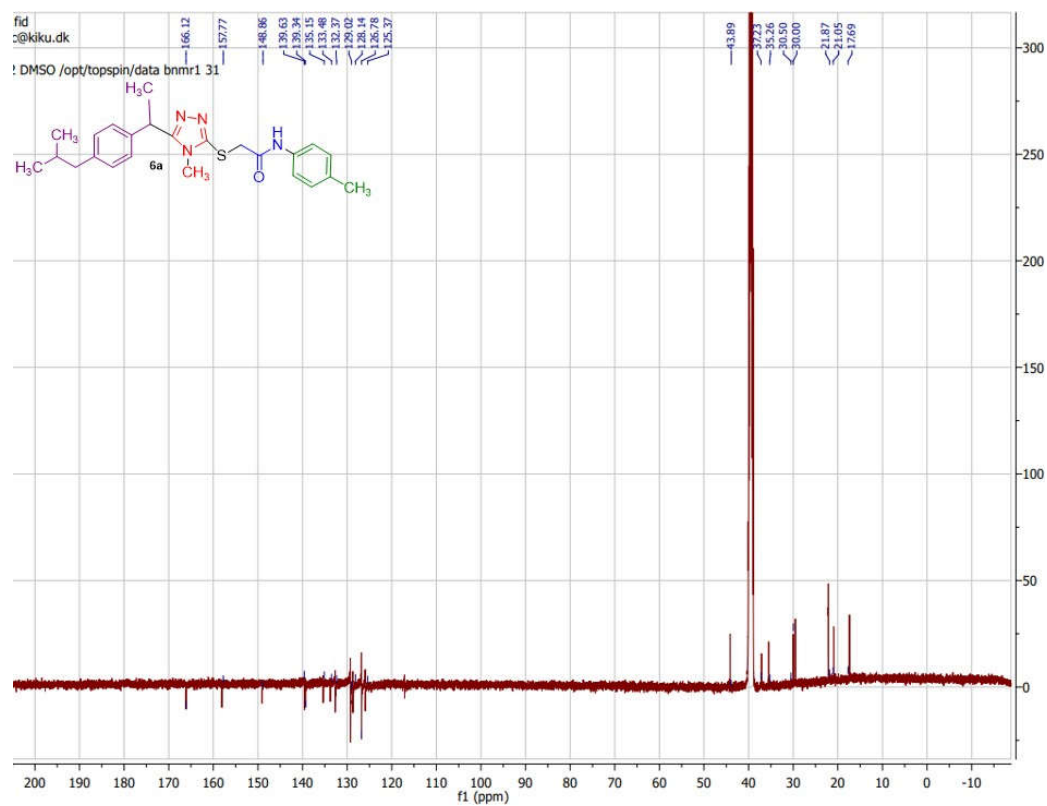

**Figure S12.** <sup>13</sup>C NMR spectrum of compound **6a** (Full spectrum)



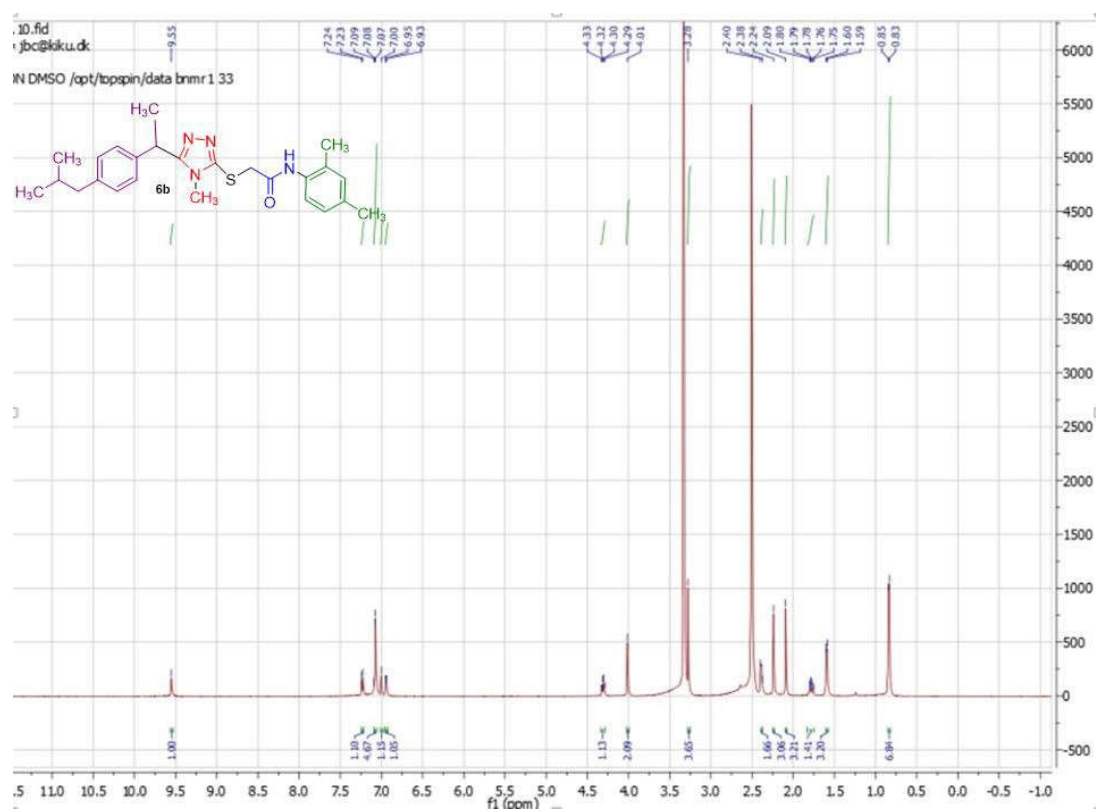

**Figure S13.**  $^1\text{H}$  NMR spectrum of compound **6b** (Full spectrum)

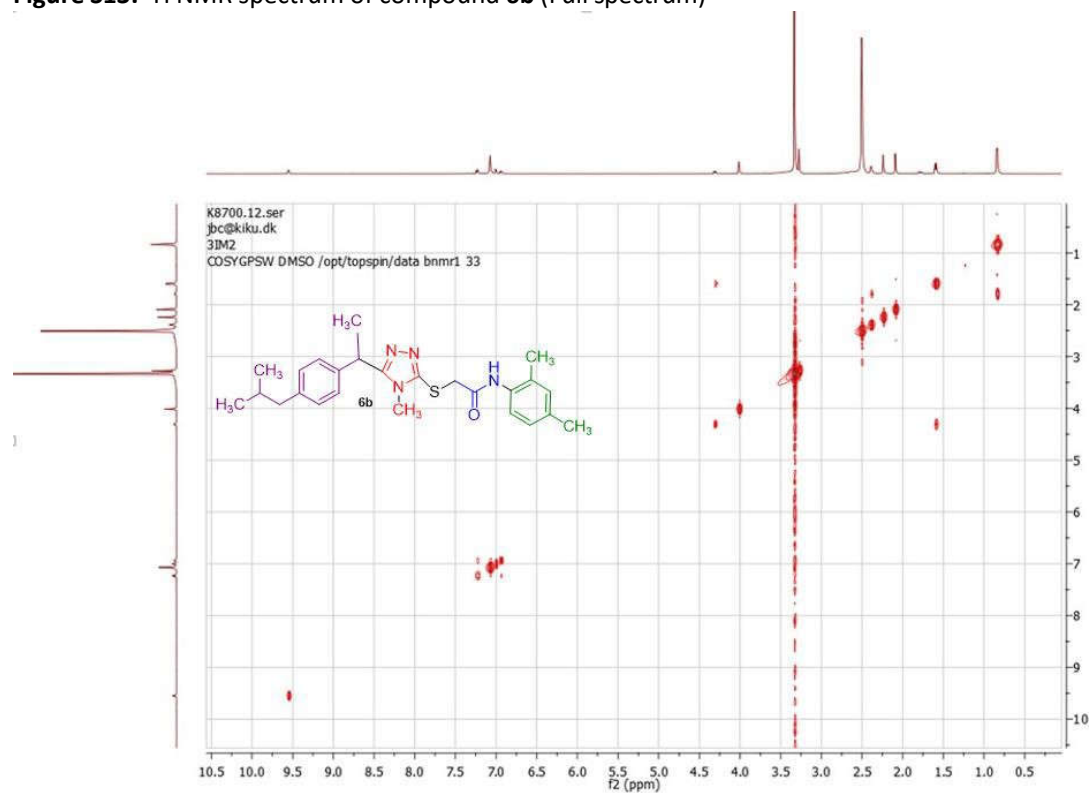

**Figure S14.** COSY- $^1\text{H}$  NMR spectrum of compound **6b**



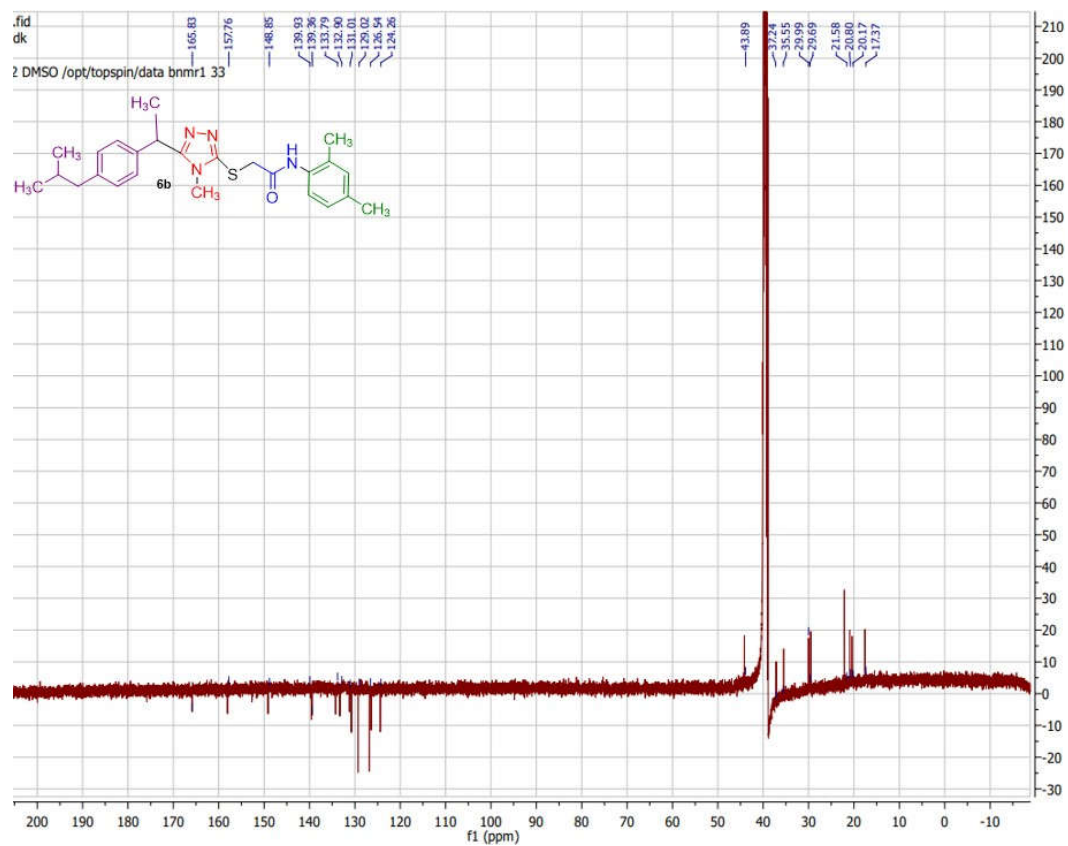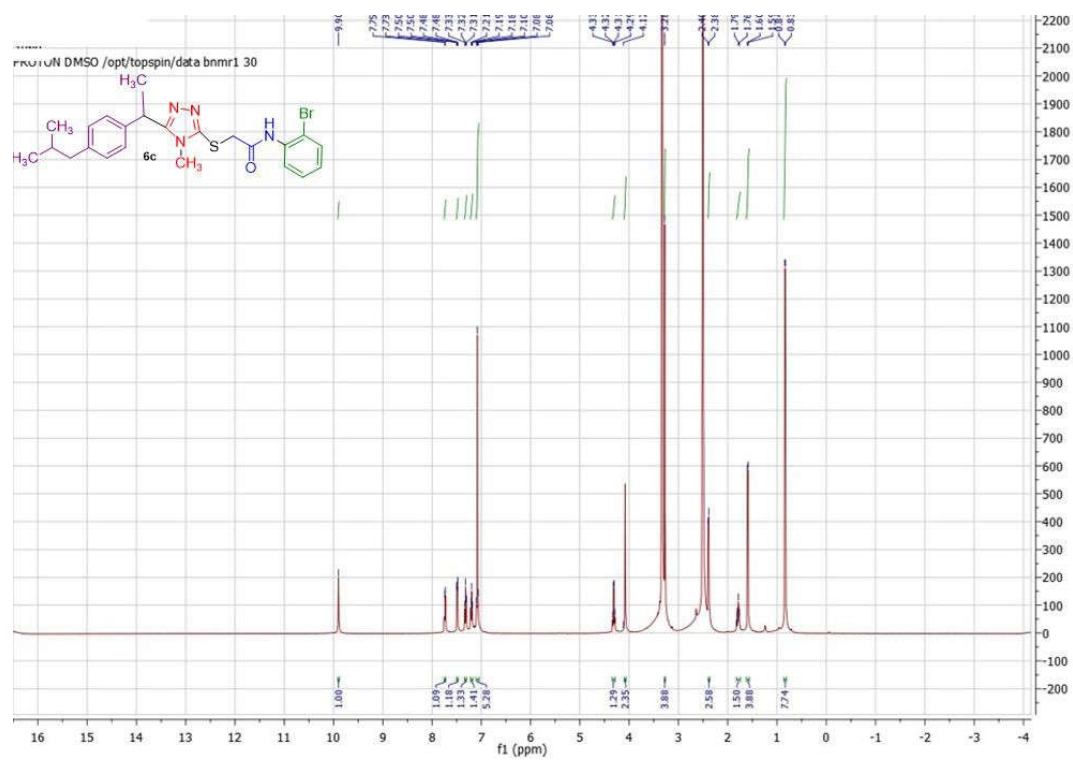



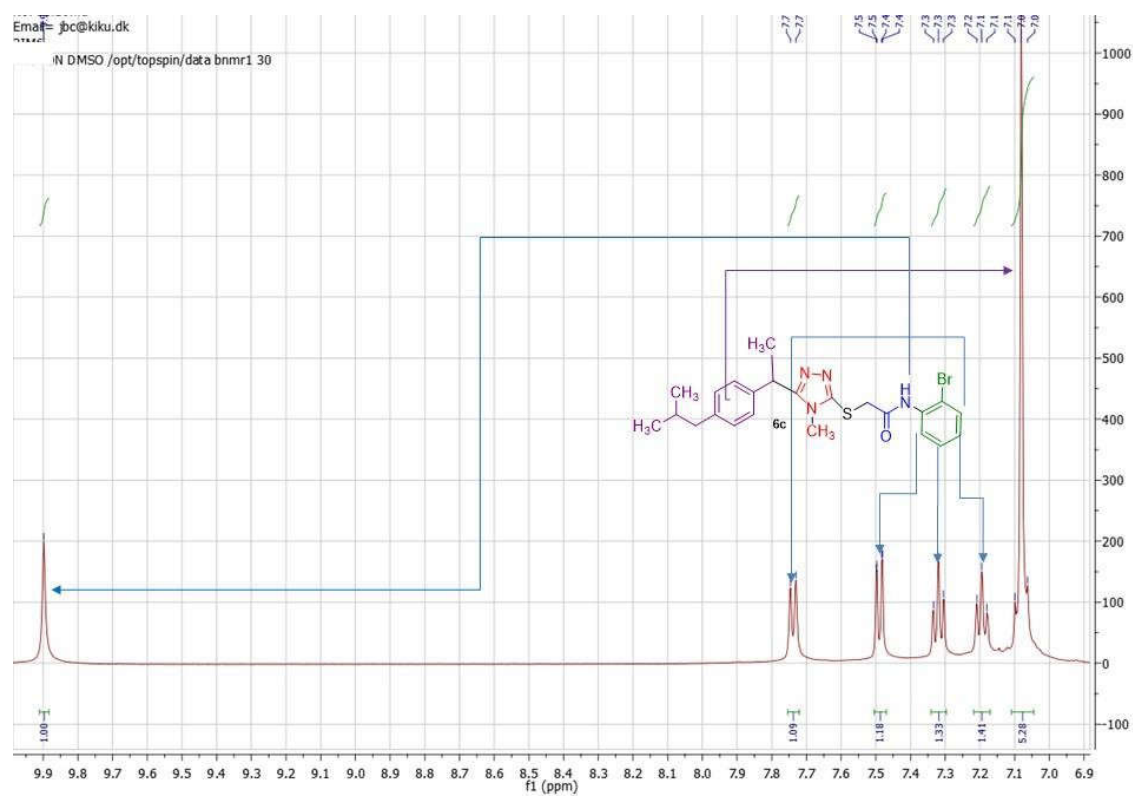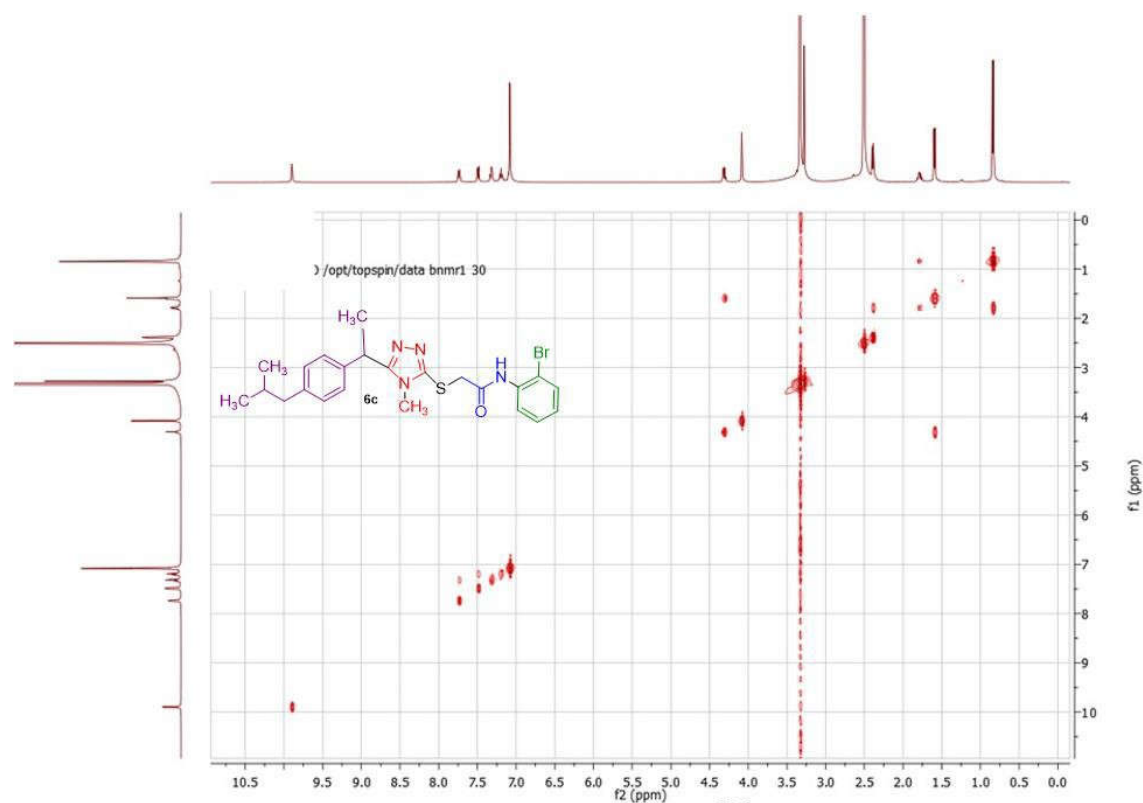



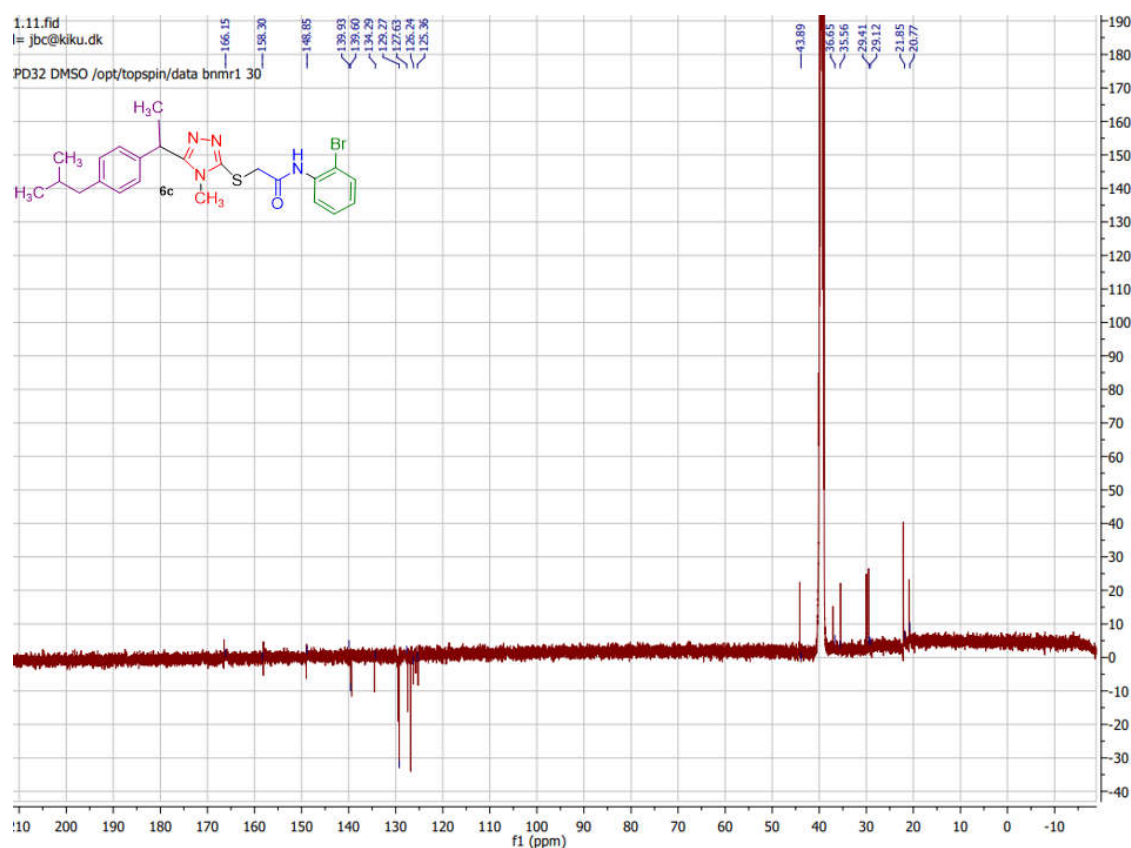

**Figure S19.**  $^{13}\text{C}$  NMR spectrum of compound **6c** (Full spectrum)

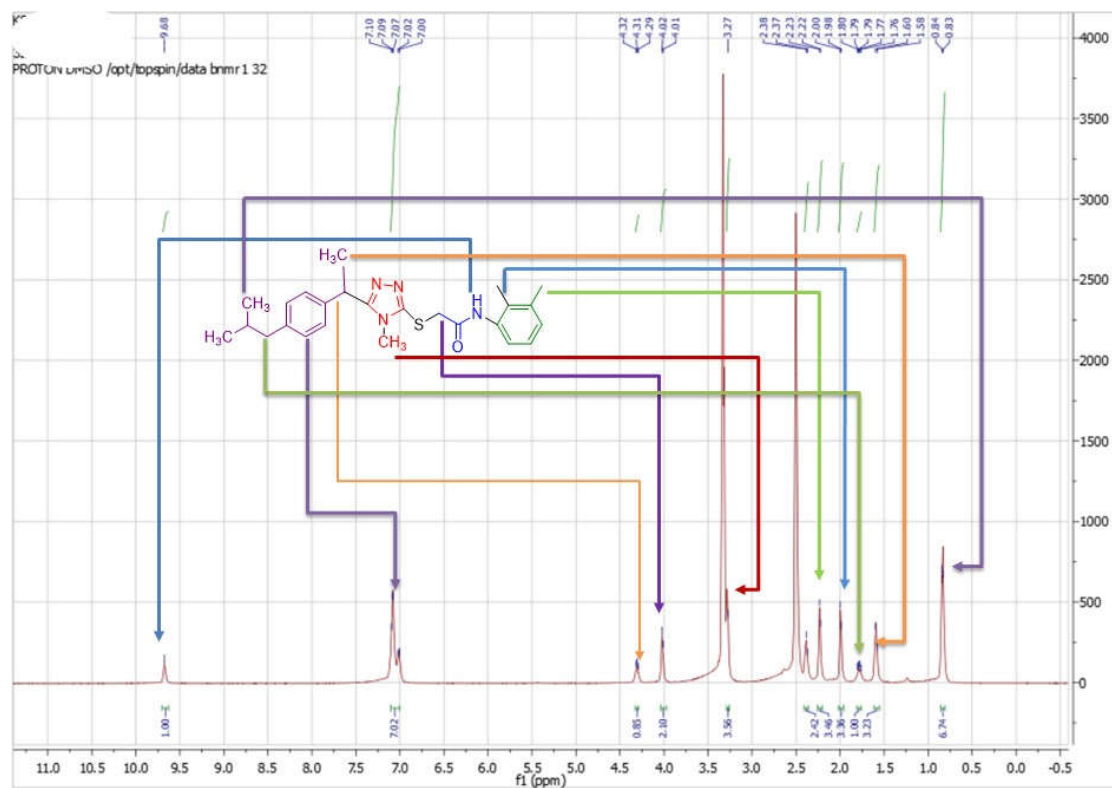

**Figure S20.**  $^1\text{H}$  NMR spectrum of compound **6d** (Full spectrum)



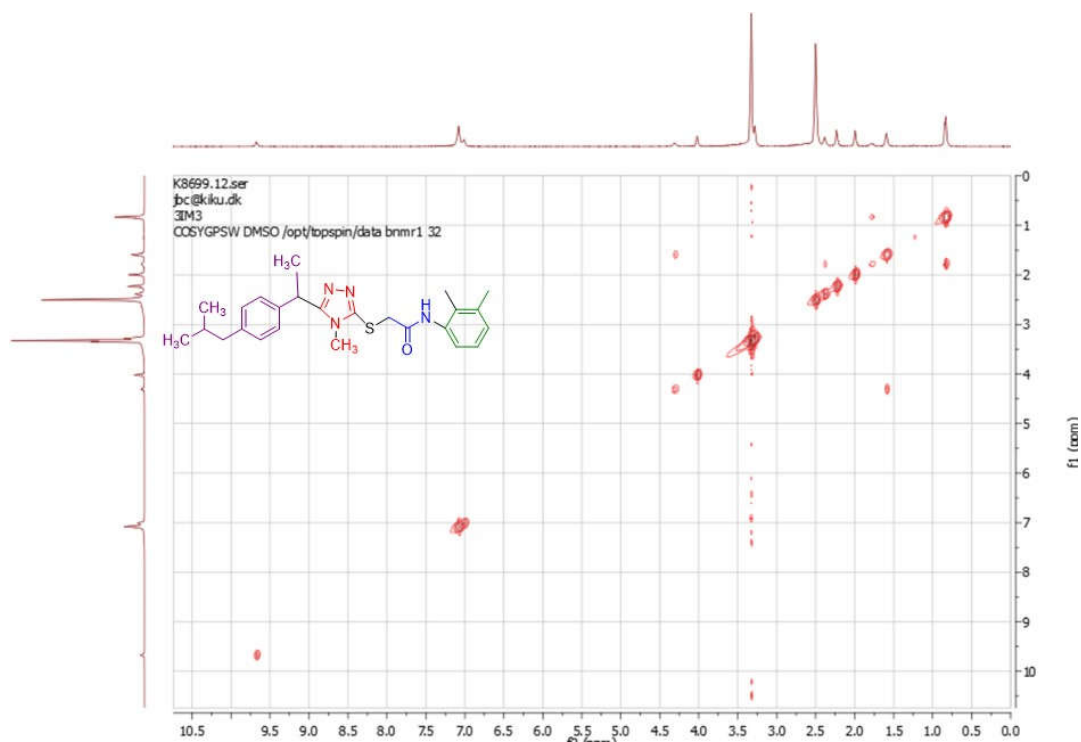

**Figure S21.** COSY  $^1\text{H}$  NMR spectrum of compound **6d**

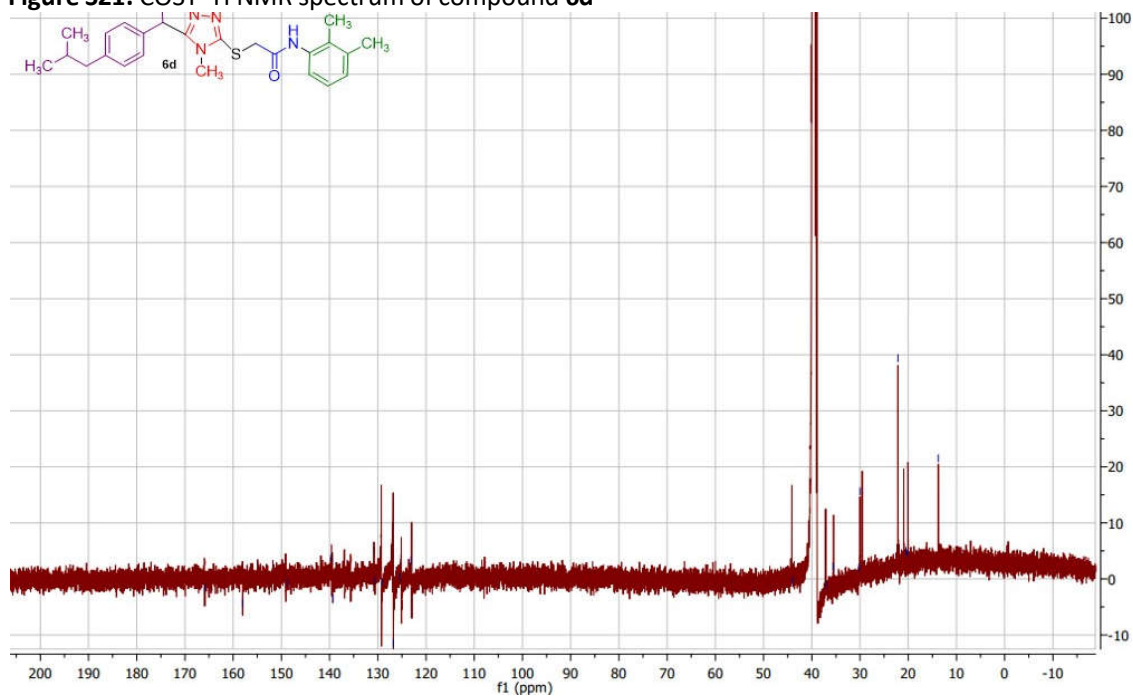

**Figure S22.**  $^{13}\text{C}$  NMR spectrum of compound **6d** (Full spectrum)



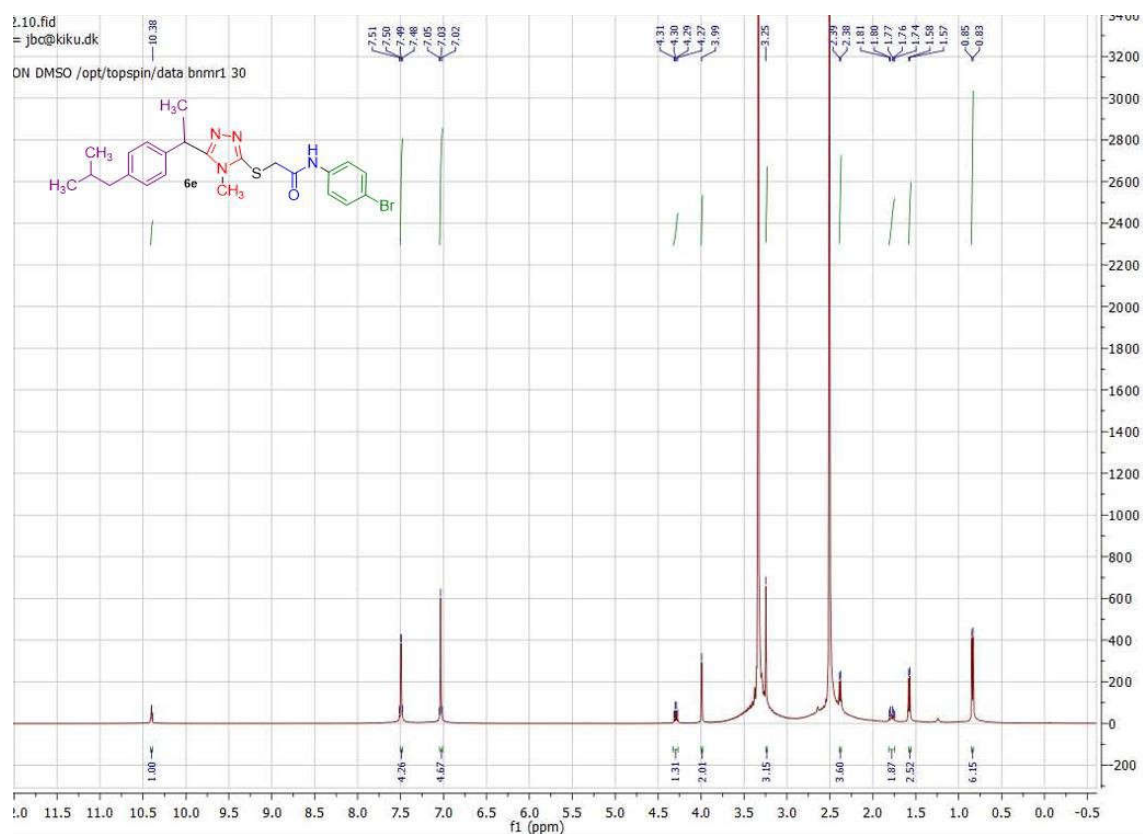

**Figure S23.**  $^1\text{H}$  NMR spectrum of compound **6e** (Full)

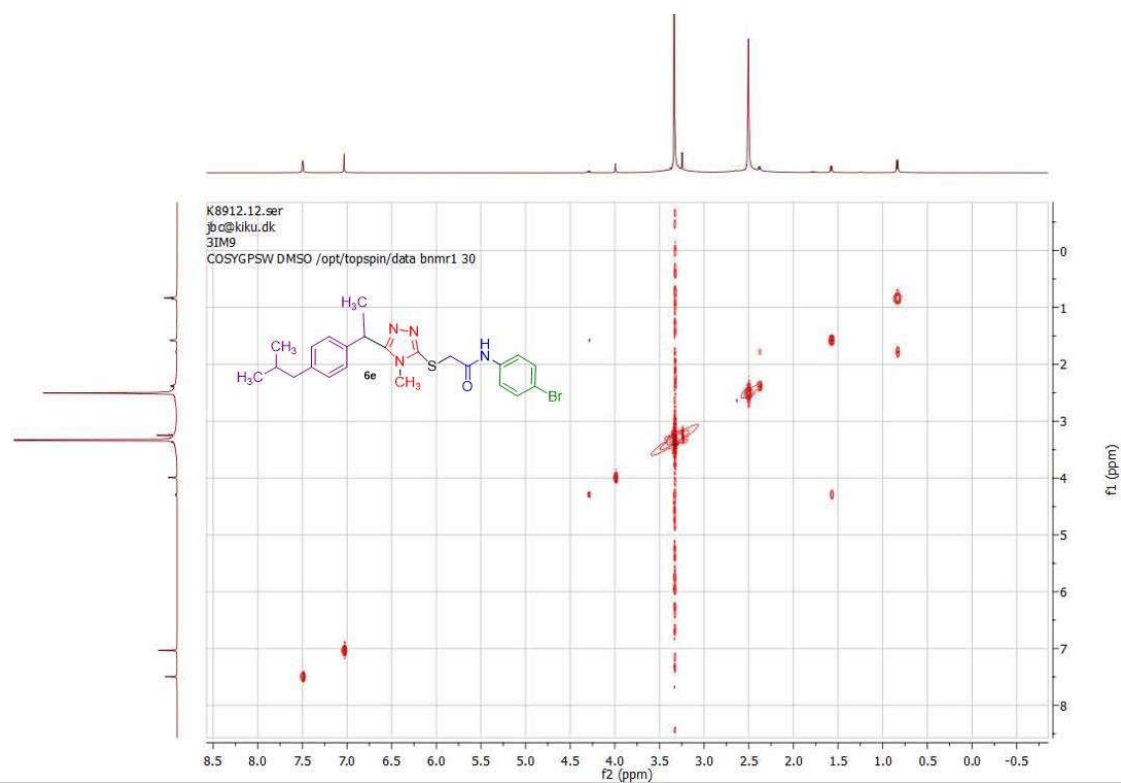

**Figure S24.** COSY  $^1\text{H}$  NMR spectrum of compound **6e**



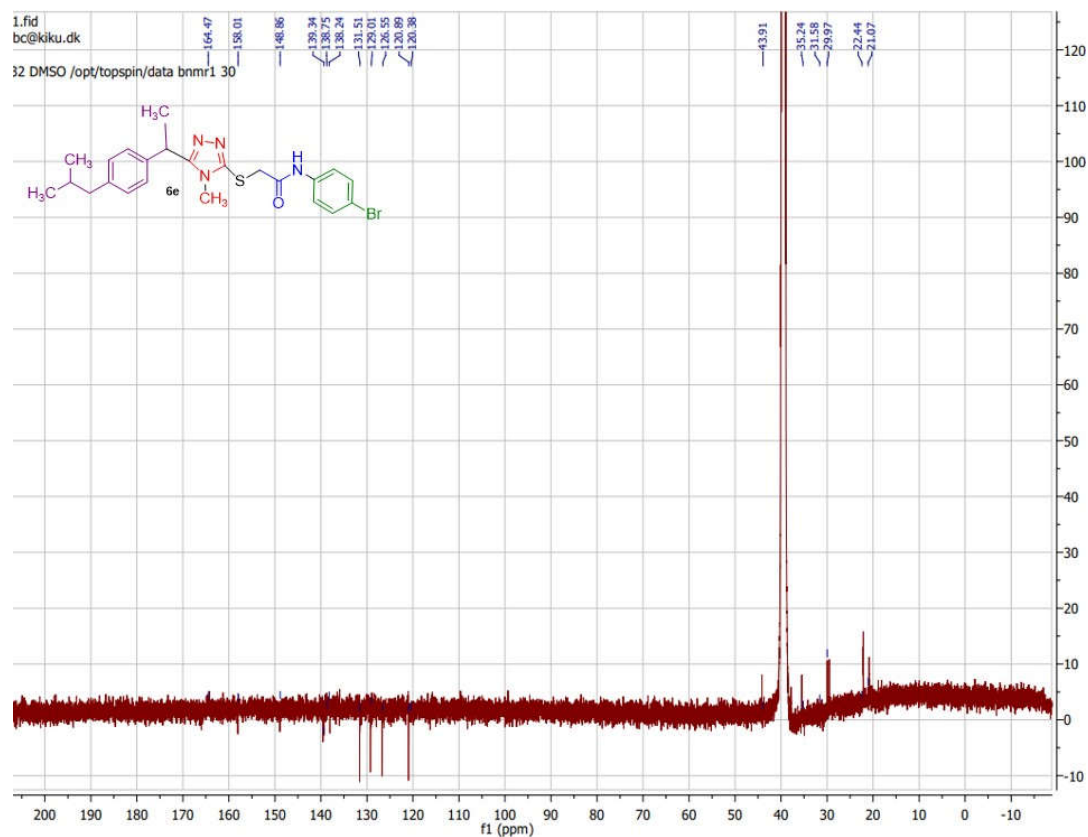

**Figure S25.**  $^{13}\text{C}$  NMR spectrum of compound **6e** (Full spectrum)

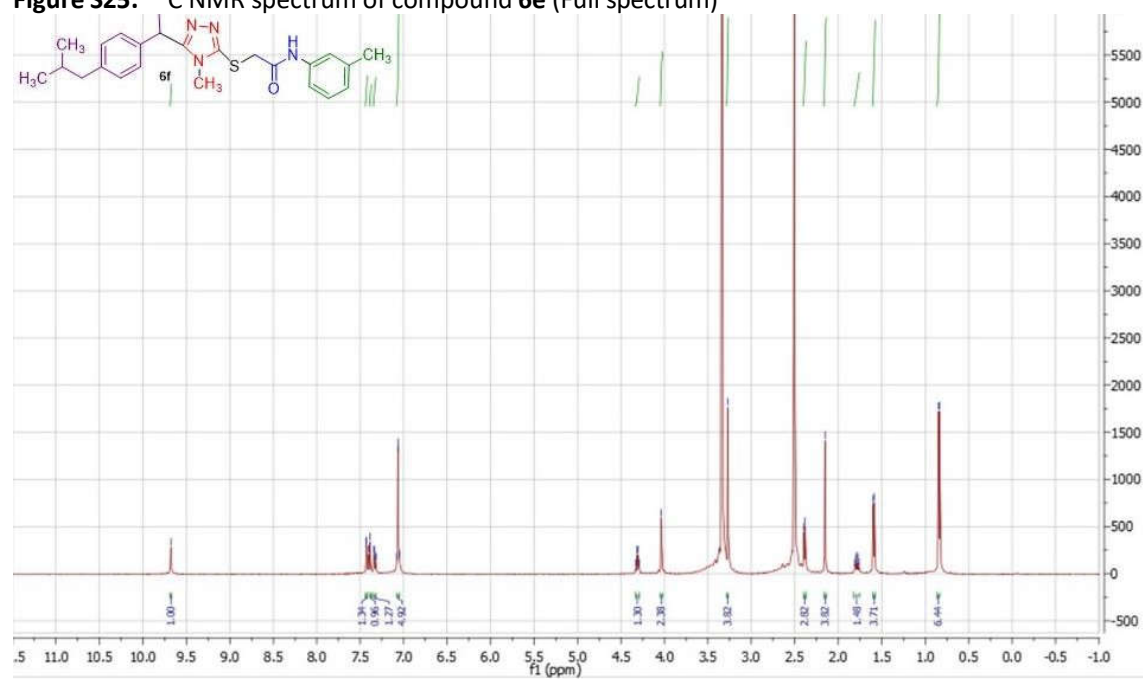

**Figure S26.**  $^1\text{H}$  NMR spectrum of compound **6f** (Full Spectrum)



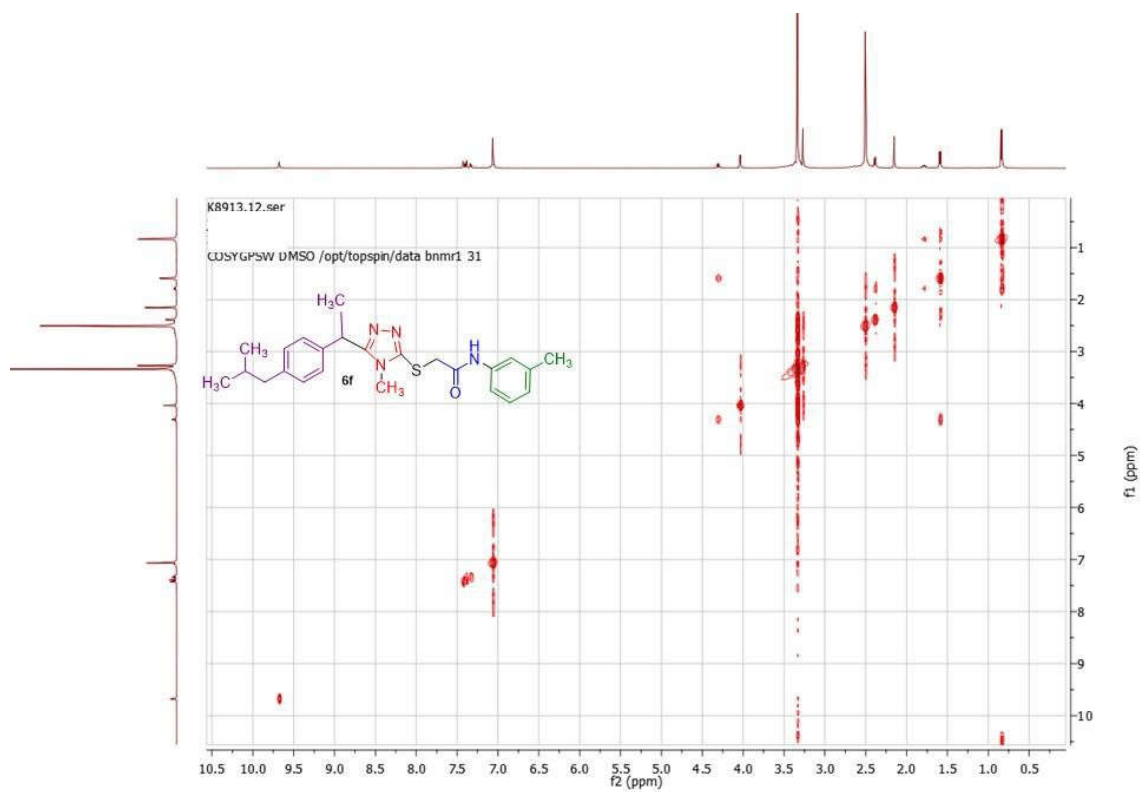

**Figure S27.** COSY  $^1\text{H}$  NMR spectrum of compound **6f**

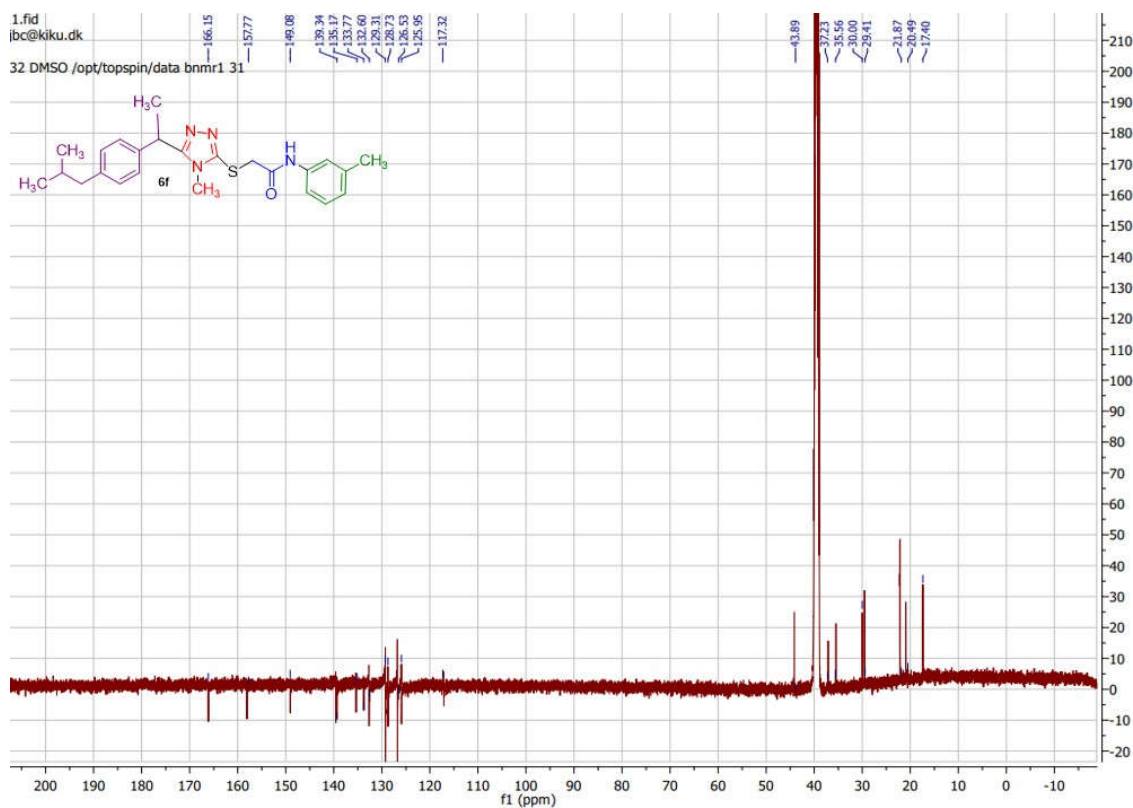

**Figure S28.**  $^{13}\text{C}$  NMR spectrum of compound **6f**



## Generic Display Report

### Analysis Info

Analysis Name S:\micr0\iro\d\analyser-routine\acq21198\_0\_H1\_000001.d

Method 10800

Sample Name IM11

Comment

Acquisition Date 7/6/2022 7:10:30 AM

Operator

Instrument solarIX XR

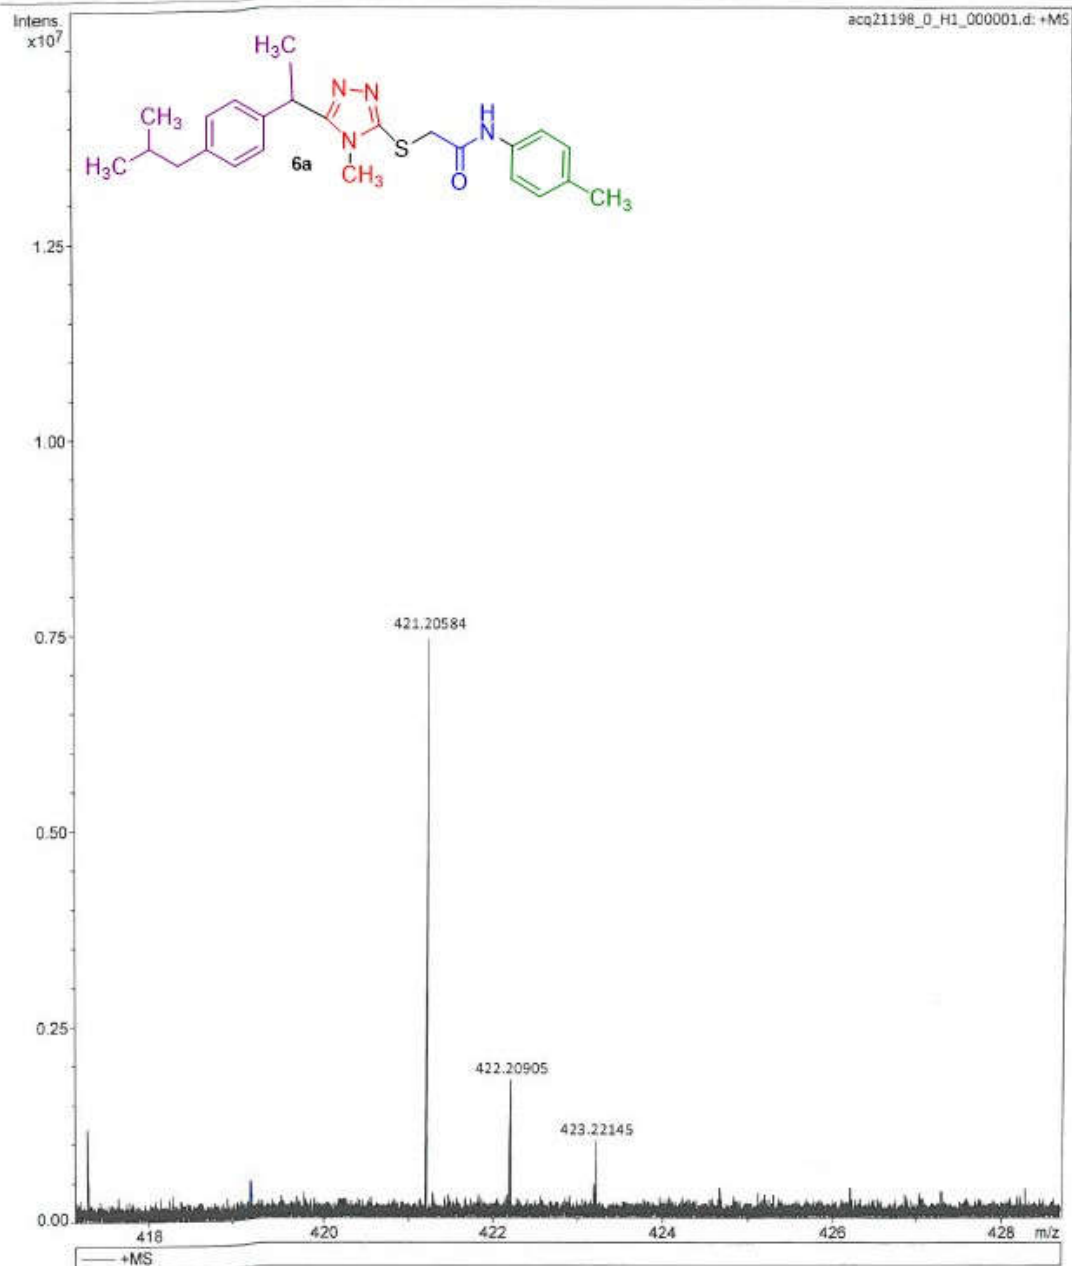

Figure S29. Mass Spectrum of compound 6a



## Generic Display Report

### Analysis Info

Analysis Name S:\fticr0\rod\analyser-routine\acq21172\_0\_C1\_000001.d  
Method ESI Pos 200-1200 4M Tuned mz 702\_86 Calibrated  
Sample Name 27-6-2022  
Comment

Acquisition Date 7/4/2022 8:31:12 AM

Operator  
Instrument solariX XR

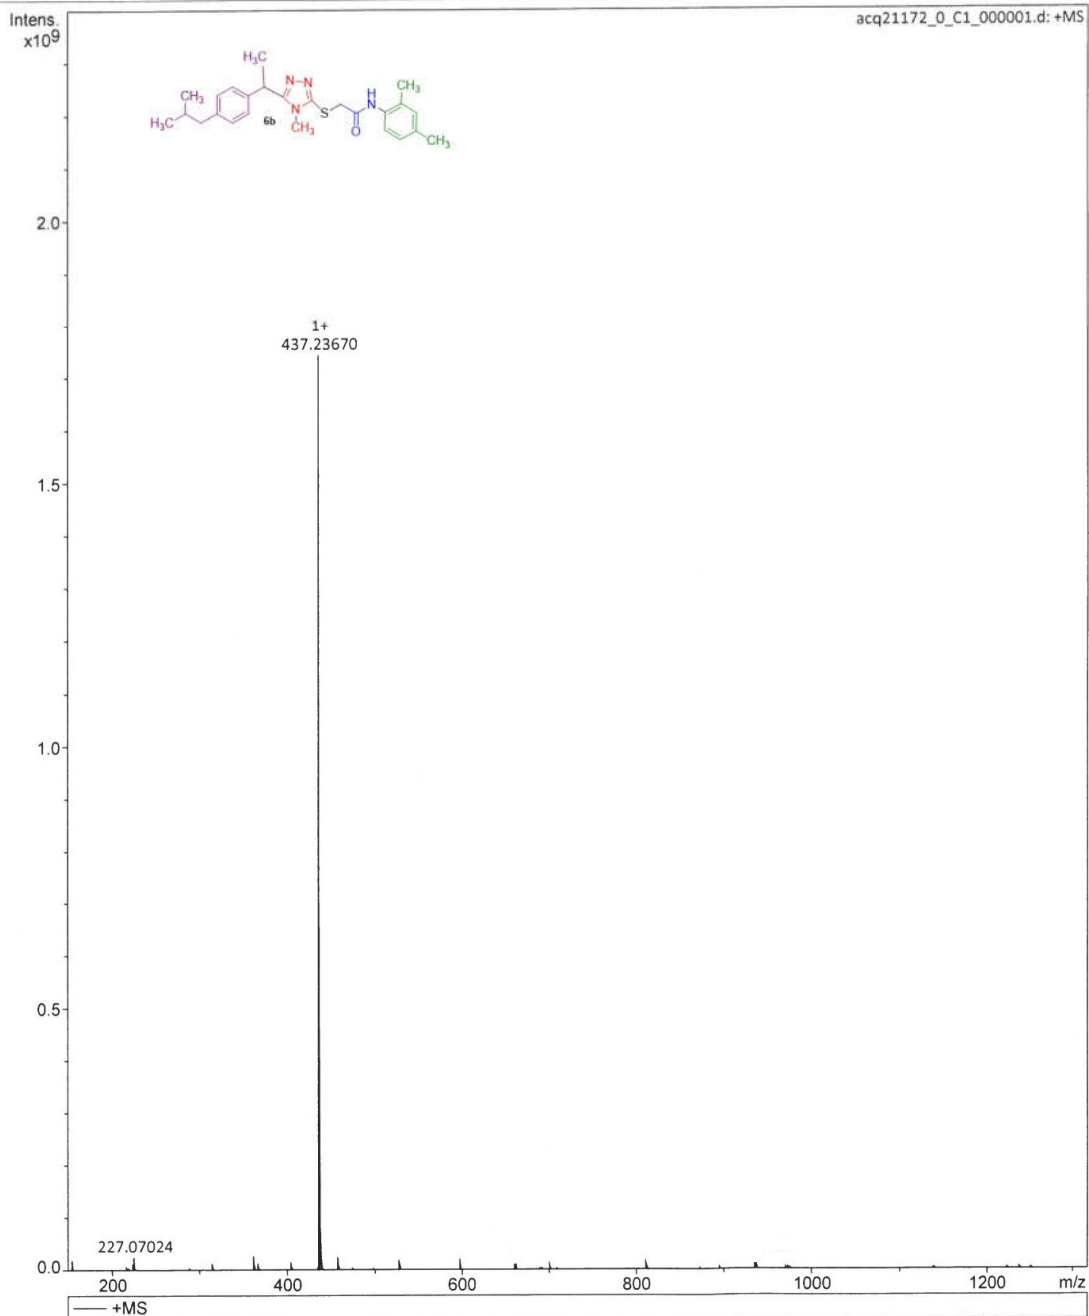

**Figure S30.** Mass Spectrum of compound 6b



## Generic Display Report

### Analysis Info

Analysis Name S:\fticr0\rod\analyser-routine\acq21201\_0\_K1\_000001.d  
Method 10800  
Sample Name IM  
Comment

Acquisition Date 7/6/2022

Operator  
Instrument solariX XR

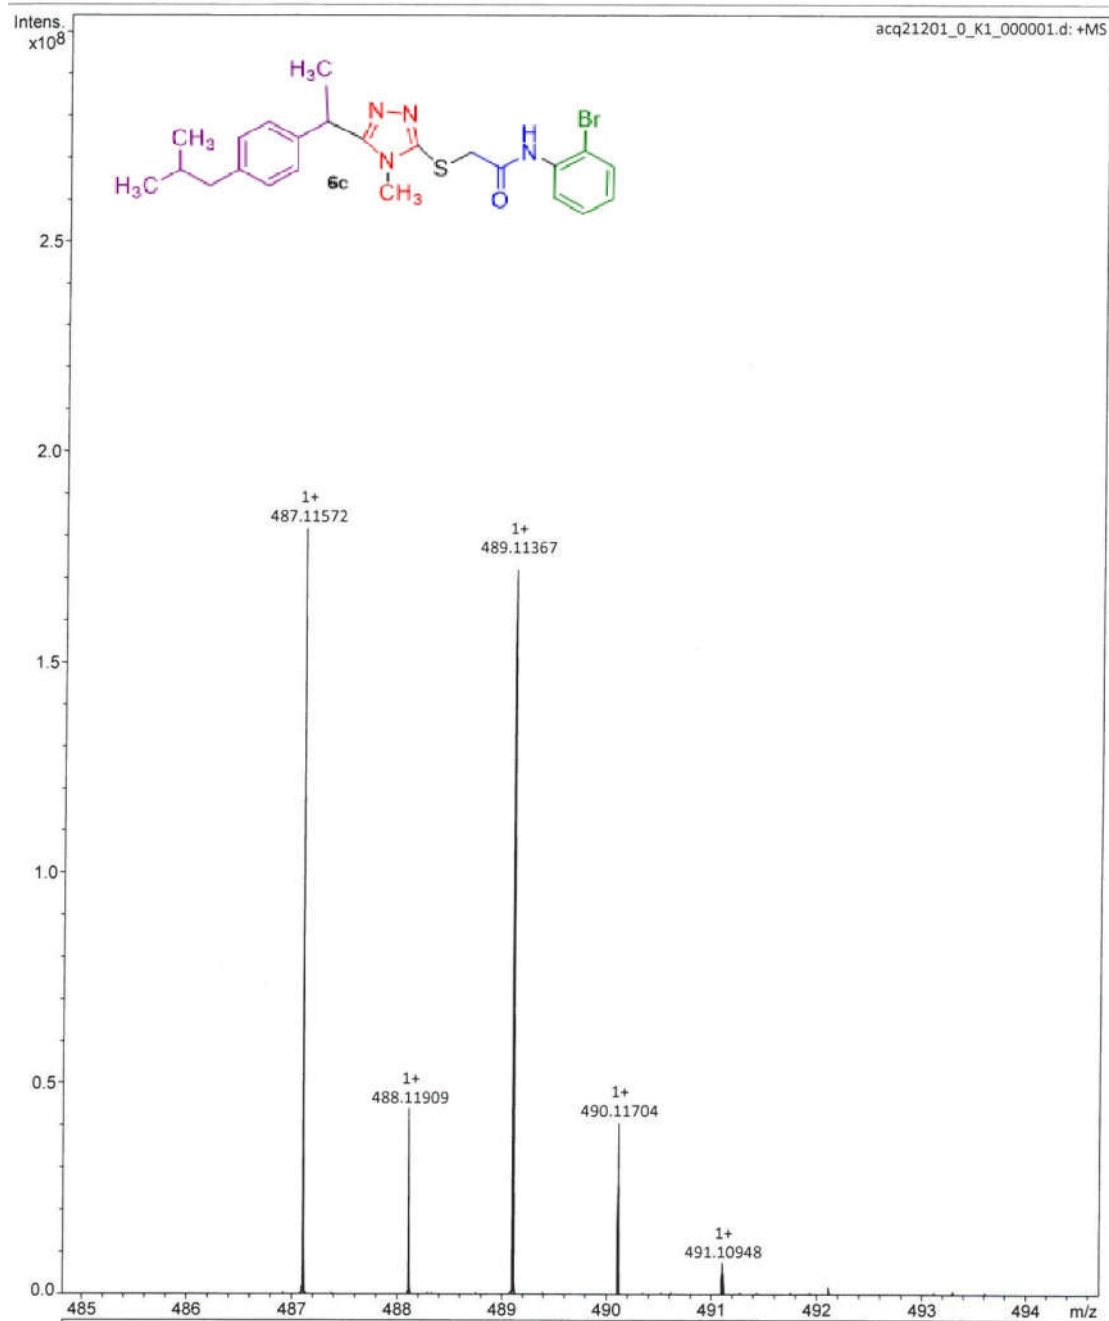

Figure S31. Mass Spectrum of compound 6c



## Generic Display Report

### Analysis Info

Analysis Name S:\fticr0\rod\analyser-routine\acq21173\_0\_D1\_000001.d  
Method ESI Pos 200-1200 4M Tuned mz 702\_86 Calibrated  
Sample Name 27-6-2022 IM3  
Comment

Acquisition Date 7/4/2022 8:32:12 AM

Operator

Instrument solariX XR

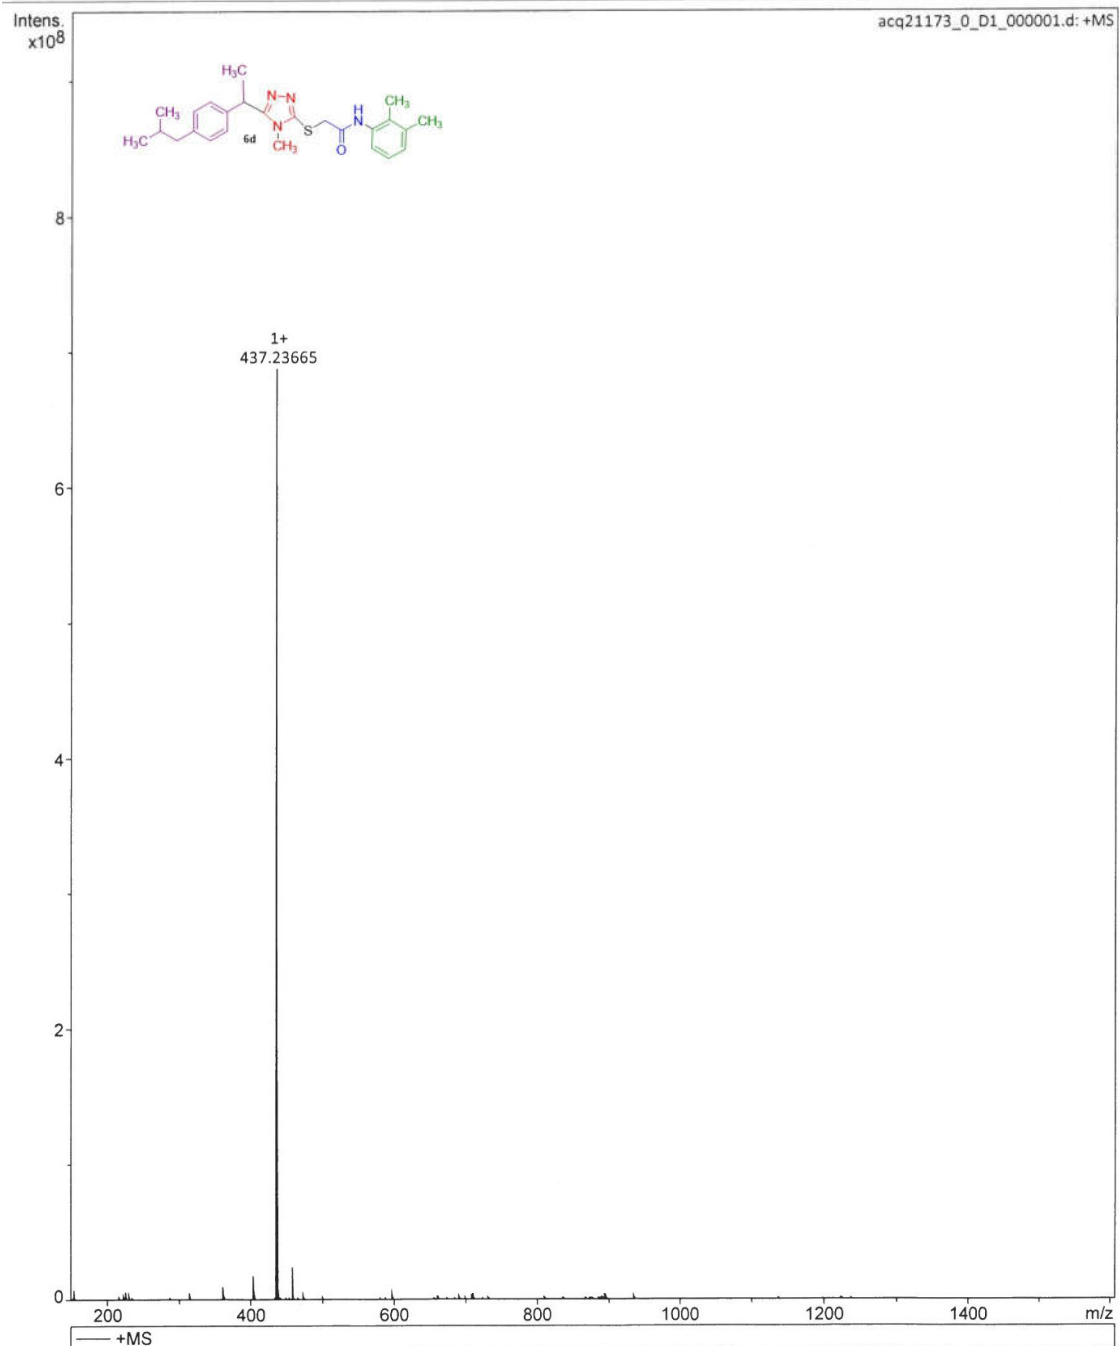

**Figure S32.** Mass Spectrum of compound 6d



## Generic Display Report

### Analysis Info

Analysis Name S:\fticr0\rod\analyser-routine\acq21201\_O\_K1\_000001.d  
Method 10800  
Sample Name IM5  
Comment

Acquisition Date 7/6/2022

Operator  
Instrument solariX XR

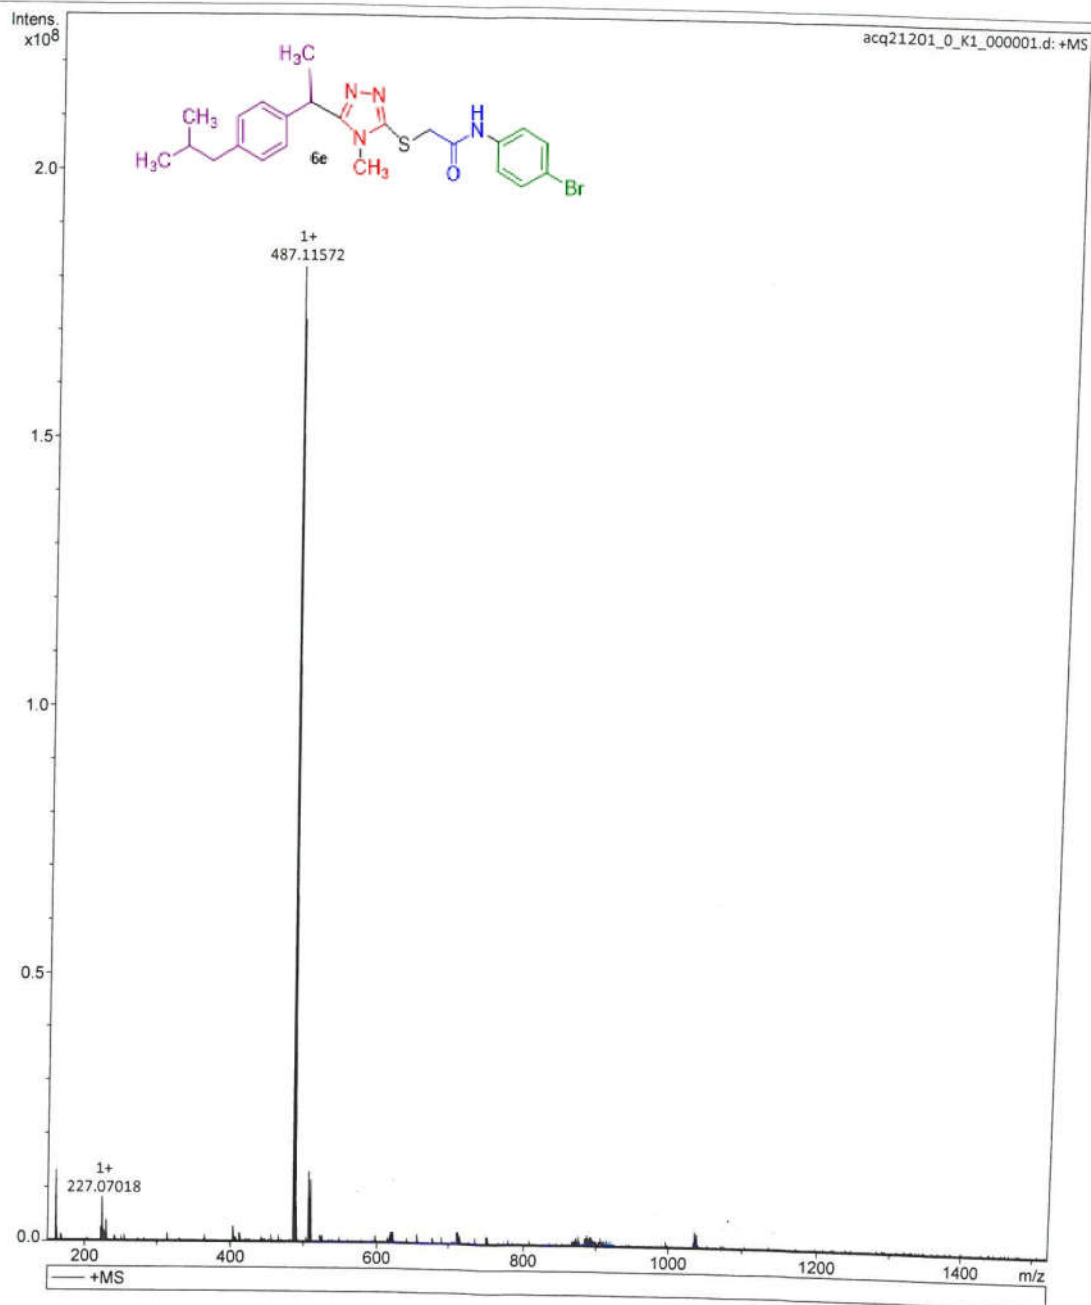

**Figure S33.** Mass Spectrum of compound 6e



## Generic Display Report

### Analysis Info

Analysis Name S:\fticr0\rod\analyser-routine\acq21202\_0\_L1\_000001.d

Method 10800

Sample Name IM10

Comment

Acquisition Date 7/6/2022

Operator

Instrument solariX XR

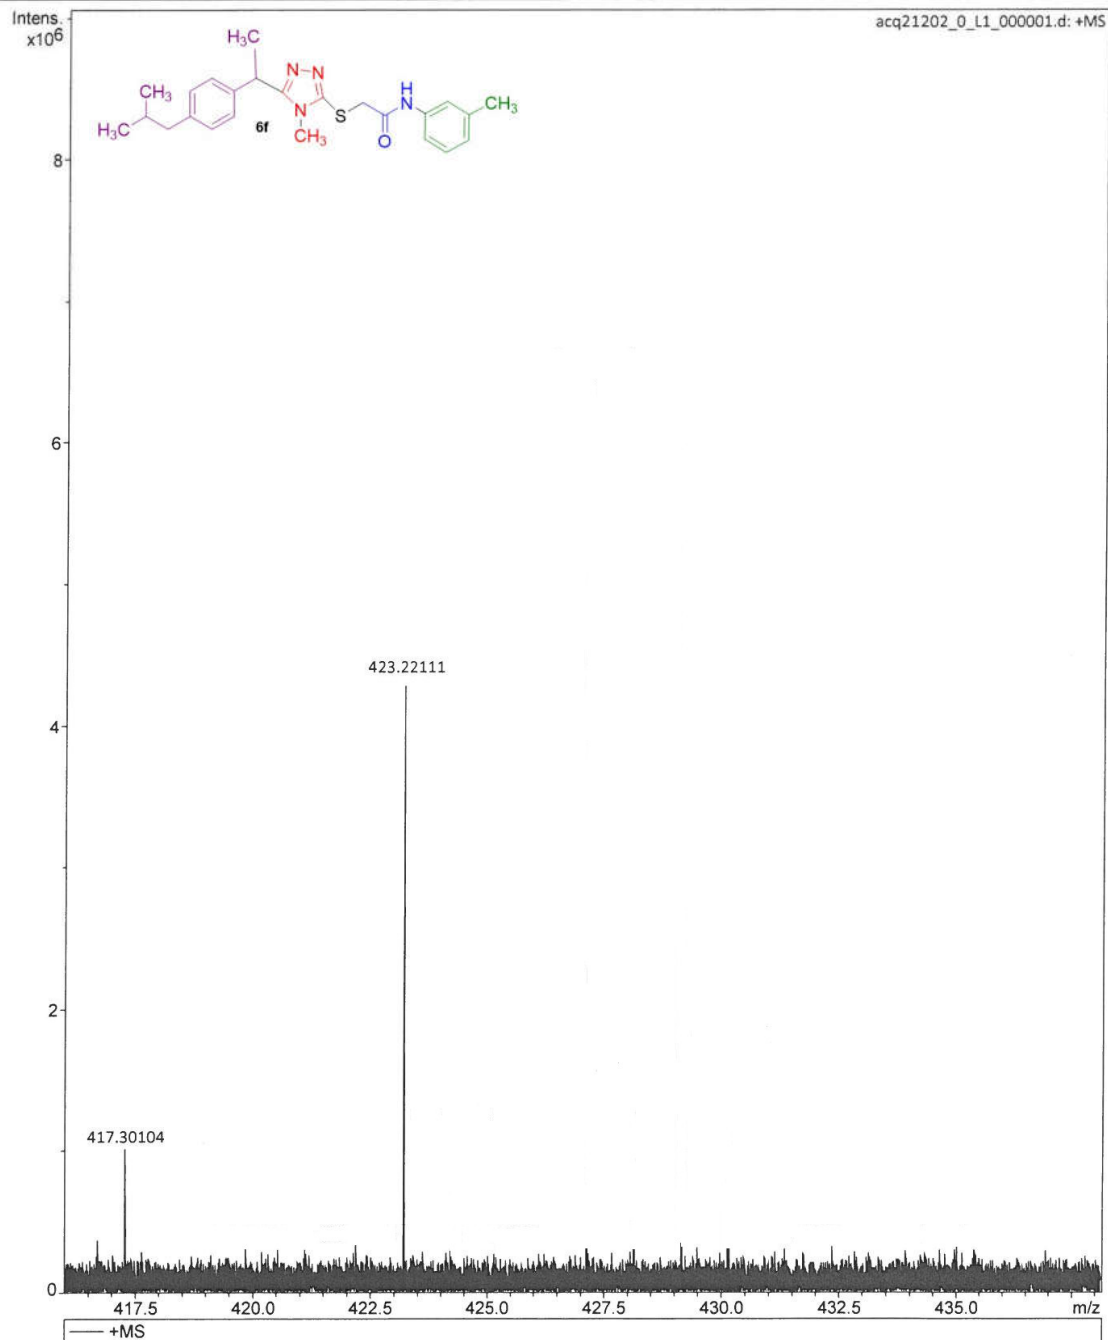

Figure S34. Mass Spectrum of compound 6f
